# Supplementary material for: Needles in the EST Haystack: Large-Scale Identification and Analysis of Excretory-Secretory (ES) Proteins in Parasitic Nematodes Using Expressed Sequence Tags (ESTs)
Source: PLoS Negl Trop Dis. 2008 Sep 24;2(9):e301. doi: 10.1371/journal.pntd.0000301 (PMC2553489; doi:10.1371/journal.pntd.0000301)
Supplement: Table S2 — Metabolic pathways in excretory-secretory proteins, mapped to Kyoto Encyclopedia of Genes and Genomes (KEGG) data. (0.56 MB XLS) [file pntd.0000301.s002.xls]

## Sheet: Pathway Mapping 
Table S2 for " Needles in the EST haystack:Large scale identification and analysis of excretory-secretory (ES) proteins in parasitic nematodes using expressed sequence tags (ESTs)"
Shivashankar H. Nagaraj, Robin B. Gasser and Shoba Ranganathan
Number	KEGG Pathway	sequence count	Sequence ID's
1	Other enzymes	79	Globodera_pallida_Contig46,Dictyocaulus_viviparus_Contig457,Ostertagia_ostertagi_Contig777;,Trichinella_spiralis_Contig2617,Haemonchus_contortus_Contig930,Ostertagia_ostertagi_Contig361,Teladorsagia_circumcincta_Contig354,Teladorsagia_circumcincta_Contig559;,Ancylostoma_caninum_Contig477,Heterodera_glycines_Contig276,Haemonchus_contortus_Contig1263,Ancylostoma_caninum_Contig8335,Ascaris_suum_Cont…
2	Protein folding and associated processing	43	Trichinella_spiralis_Contig1973,Dictyocaulus_viviparus_Contig143,Globodera_pallida_Contig41,Haemonchus_contortus_Contig649,Onchocerca_volvulus_Contig649,Heterodera_glycines_Contig23,Brugia_malayi_Contig2255,Meloidogyne_hapla_Contig1918,Trichuris_muris_Contig211,Ancylostoma_ceylanicum_Contig249,Teladorsagia_circumcincta_Contig108;,Strongyloides_stercoralis_Contig142,Globodera_rostochiensis_Contig1…
3	Antigen processing and presentation	41	Haemonchus_contortus_Contig525,Trichinella_spiralis_Contig1973,Haemonchus_contortus_Contig1874,Haemonchus_contortus_Contig649,Haemonchus_contortus_Contig317,Litomosoides_sigmodontis_Contig339,Ancylostoma_ceylanicum_Contig364,Parastrongyloides_trichosuri_Contig822,Wuchereria_bancrofti_Contig268,Haemonchus_contortus_Contig774,Brugia_malayi_Contig1113,Trichinella_spiralis_Contig698,Trichuris_muris_C…
4	Arachidonic acid metabolism	17	Haemonchus_contortus_Contig253,Dictyocaulus_viviparus_Contig309,Teladorsagia_circumcincta_Contig338,Necator_americanus_Contig605,Ancylostoma_caninum_Contig9875,Heterodera_glycines_Contig3522,Brugia_malayi_Contig1839,Pratylenchus_vulnus_Contig143,Globodera_rostochiensis_Contig1662,Haemonchus_contortus_Contig1086,Ancylostoma_caninum_Contig392,Heterodera_schachtii_Contig335,Ostertagia_ostertagi_Cont…
5	Ribosome	17	Globodera_pallida_Contig392;,Parastrongyloides_trichosuri_Contig864,Ascaris_suum_Contig1517,Trichuris_vulpis_Contig292,Trichinella_spiralis_Contig3054,Haemonchus_contortus_Contig942,Ancylostoma_caninum_Contig1757;,Ascaris_suum_Contig2645,Haemonchus_contortus_Contig458,Radopholus_similis_Contig1148,Heterodera_glycines_Contig587,Teladorsagia_circumcincta_Contig307,Radopholus_similis_Contig1151,Brug…
6	MAPK signaling pathway	13	Haemonchus_contortus_Contig253,Dictyocaulus_viviparus_Contig309,Ancylostoma_ceylanicum_Contig113,Necator_americanus_Contig605,Strongyloides_stercoralis_Contig18,Strongyloides_stercoralis_Contig19,Haemonchus_contortus_Contig1086,Meloidogyne_chitwoodi_Contig864,Haemonchus_contortus_Contig1209,Dictyocaulus_viviparus_Contig135,Brugia_malayi_Contig1761,Teladorsagia_circumcincta_Contig667,Wuchereria_ba…
7	Glutathione metabolism	12	Teladorsagia_circumcincta_Contig338,Heterodera_glycines_Contig449,Ancylostoma_caninum_Contig9875,Heterodera_glycines_Contig3522,Brugia_malayi_Contig1839,Pratylenchus_vulnus_Contig143,Globodera_rostochiensis_Contig1662,Ancylostoma_caninum_Contig392,Ostertagia_ostertagi_Contig476,Xiphinema_index_Contig393,Meloidogyne_incognita_Contig86,Heterodera_schachtii_Contig335
8	Starch and sucrose metabolism	12	Meloidogyne_hapla_Contig1483,Heterodera_glycines_Contig3104,Heterodera_schachtii_Contig83,Ancylostoma_caninum_Contig2301,Heterodera_glycines_Contig457,Ancylostoma_caninum_Contig4327,Ascaris_suum_Contig2020,Heterodera_glycines_Contig3552,Globodera_rostochiensis_Contig1799,Heterodera_glycines_Contig3557,Strongyloides_stercoralis_Contig868,Meloidogyne_chitwoodi_Contig1063
9	Amyotrophic lateral sclerosis (ALS)	10	Xiphinema_index_Contig865,Necator_americanus_Contig525,Ancylostoma_caninum_Contig10411;,Dirofilaria_immitis_Contig310,Toxocara_canis_Contig541;,Meloidogyne_hapla_Contig931,Haemonchus_contortus_Contig1084,Ancylostoma_caninum_Contig6346,Haemonchus_contortus_Contig1378,Ostertagia_ostertagi_Contig369
10	Purine metabolism	10	Nippostrongylus_brasiliensis_Contig574,Teladorsagia_circumcincta_Contig624,Ancylostoma_caninum_Contig9137,Ancylostoma_ceylanicum_Contig12,Ancylostoma_caninum_Contig10035,Ancylostoma_caninum_Contig9781,Ancylostoma_caninum_Contig9840,Ostertagia_ostertagi_Contig629,Ancylostoma_caninum_Contig10057,Ancylostoma_caninum_Contig2402
11	Other amino acid metabolism	9	Toxocara_canis_Contig491,Ancylostoma_ceylanicum_Contig604,Ancylostoma_caninum_Contig8088,Trichinella_spiralis_Contig1737,Haemonchus_contortus_Contig785,Haemonchus_contortus_Contig1319,Trichinella_spiralis_Contig93,Heterodera_glycines_Contig820,Brugia_malayi_Contig416
12	N-Glycan biosynthesis	9	Brugia_malayi_Contig2071,Trichinella_spiralis_Contig797,Ancylostoma_caninum_Contig711,Strongyloides_ratti_Contig51,Ancylostoma_caninum_Contig6919,Trichinella_spiralis_Contig231,Heterodera_glycines_Contig609,Meloidogyne_hapla_Contig335;,Haemonchus_contortus_Contig773
13	Oxidative phosphorylation	9	Ancylostoma_ceylanicum_Contig499,Ancylostoma_ceylanicum_Contig461,Necator_americanus_Contig132,Meloidogyne_incognita_Contig455,Meloidogyne_arenaria_Contig448,Trichinella_spiralis_Contig1576,Nippostrongylus_brasiliensis_Contig464,Teladorsagia_circumcincta_Contig658,Globodera_rostochiensis_Contig1791
14	VEGF signaling pathway	8	Haemonchus_contortus_Contig253,Dictyocaulus_viviparus_Contig309,Ancylostoma_caninum_Contig1910;,Necator_americanus_Contig605,Haemonchus_contortus_Contig1086,Meloidogyne_chitwoodi_Contig864,Haemonchus_contortus_Contig1209,Teladorsagia_circumcincta_Contig667
15	Pyrimidine metabolism	8	Nippostrongylus_brasiliensis_Contig574,Teladorsagia_circumcincta_Contig624,Ancylostoma_ceylanicum_Contig12,Ancylostoma_caninum_Contig10035,Ancylostoma_caninum_Contig9781,Ancylostoma_caninum_Contig9840,Ostertagia_ostertagi_Contig629,Ancylostoma_caninum_Contig10057
16	GnRH signaling pathway	8	Haemonchus_contortus_Contig253,Dictyocaulus_viviparus_Contig309,Xiphinema_index_Contig1097,Necator_americanus_Contig605,Xiphinema_index_Contig1162,Haemonchus_contortus_Contig1086,Haemonchus_contortus_Contig1209,Teladorsagia_circumcincta_Contig667
17	Linoleic acid metabolism	7	Haemonchus_contortus_Contig253,Dictyocaulus_viviparus_Contig309,Necator_americanus_Contig605,Heterodera_glycines_Contig921,Haemonchus_contortus_Contig1086,Haemonchus_contortus_Contig1209,Teladorsagia_circumcincta_Contig667
18	Complement and coagulation cascades	6	Trichuris_vulpis_Contig293,Trichinella_spiralis_Contig1453,Xiphinema_index_Contig989,Trichinella_spiralis_Contig1469,Odm02F03,Trichinella_spiralis_Contig164
19	Pores ion channels	6	Ancylostoma_ceylanicum_Contig113,Strongyloides_stercoralis_Contig18,Meloidogyne_hapla_Contig1714,Strongyloides_stercoralis_Contig19,Dictyocaulus_viviparus_Contig135,Brugia_malayi_Contig1761
20	Ether lipid metabolism	6	Haemonchus_contortus_Contig253,Dictyocaulus_viviparus_Contig309,Necator_americanus_Contig605,Haemonchus_contortus_Contig1086,Haemonchus_contortus_Contig1209,Teladorsagia_circumcincta_Contig667
21	Fc epsilon RI signaling pathway	6	Haemonchus_contortus_Contig253,Dictyocaulus_viviparus_Contig309,Necator_americanus_Contig605,Haemonchus_contortus_Contig1086,Haemonchus_contortus_Contig1209,Teladorsagia_circumcincta_Contig667
22	Neuroactive ligand-receptor interaction	6	Trichuris_vulpis_Contig293,Trichinella_spiralis_Contig1453,Xiphinema_index_Contig989,Trichinella_spiralis_Contig2286,Trichinella_spiralis_Contig1469,Trichinella_spiralis_Contig164
23	Glycerophospholipid metabolism	6	Haemonchus_contortus_Contig253,Dictyocaulus_viviparus_Contig309,Necator_americanus_Contig605,Haemonchus_contortus_Contig1086,Haemonchus_contortus_Contig1209,Teladorsagia_circumcincta_Contig667
24	ATP synthesis	6	Heterodera_glycines_Contig1455,Haemonchus_contortus_Contig755,Meloidogyne_hapla_Contig1559,Litomosoides_sigmodontis_Contig12,Litomosoides_sigmodontis_Contig135,Heterodera_glycines_Contig3607
25	Calcium signaling pathway	6	Ancylostoma_caninum_Contig1910;,Xiphinema_index_Contig1097,Xiphinema_index_Contig1162,Trichuris_muris_Contig274,Meloidogyne_chitwoodi_Contig864,Meloidogyne_hapla_Contig1641
26	Long-term depression	6	Haemonchus_contortus_Contig253,Dictyocaulus_viviparus_Contig309,Necator_americanus_Contig605,Haemonchus_contortus_Contig1086,Haemonchus_contortus_Contig1209,Teladorsagia_circumcincta_Contig667
27	Nucleotide sugars metabolism	5	Heterodera_glycines_Contig921,Meloidogyne_chitwoodi_Contig554,Ancylostoma_caninum_Contig4809,Meloidogyne_arenaria_Contig178,Meloidogyne_hapla_Contig1081
28	Citrate cycle (TCA cycle)	5	Ancylostoma_ceylanicum_Contig499,Onchocerca_volvulus_Contig962,Ancylostoma_caninum_Contig7345,Ancylostoma_ceylanicum_Contig461,Ancylostoma_ceylanicum_Contig153
29	Alzheimer's disease	4	Necator_americanus_Contig572,Necator_americanus_Contig13,Brugia_malayi_Contig392,Meloidogyne_javanica_Contig13
30	Type I diabetes mellitus	4	Ancylostoma_ceylanicum_Contig713,Litomosoides_sigmodontis_Contig142,Brugia_malayi_Contig1100,Necator_americanus_Contig405
31	Riboflavin metabolism	4	Toxocara_canis_Contig479,Meloidogyne_hapla_Contig2376,Litomosoides_sigmodontis_Contig254,Trichinella_spiralis_Contig3217
32	Inorganic ion transport and metabolism	4	Haemonchus_contortus_Contig1179,Wuchereria_bancrofti_Contig373,Radopholus_similis_Contig877;,Onchocerca_volvulus_Contig474
33	Nitrogen metabolism	4	Heterodera_glycines_Contig1908,Brugia_malayi_Contig1514,Ancylostoma_caninum_Contig8094;,Ascaris_suum_Contig1960
34	Fructose and mannose metabolism	4	Heterodera_glycines_Contig921,Ancylostoma_caninum_Contig3516,Trichuris_vulpis_Contig296,Ascaris_suum_Contig2628
35	gamma-Hexachlorocyclohexane degradation	4	Toxocara_canis_Contig479,Meloidogyne_hapla_Contig2376,Litomosoides_sigmodontis_Contig254,Trichinella_spiralis_Contig3217
36	General function prediction only	4	Haemonchus_contortus_Contig442,Heterodera_glycines_Contig1927,Ancylostoma_caninum_Contig533;,Teladorsagia_circumcincta_Contig349
37	Glycolysis / Gluconeogenesis	4	Ascaris_suum_Contig2401,Ascaris_suum_Contig2628,Dictyocaulus_viviparus_Contig57,Meloidogyne_incognita_Contig2289
38	Regulation of actin cytoskeleton	4	Trichuris_vulpis_Contig293,Ancylostoma_caninum_Contig4904,Ascaris_suum_Contig194,Strongyloides_stercoralis_Contig432
39	Signal transduction mechanisms	4	Haemonchus_contortus_Contig1304,Strongyloides_ratti_Contig1075,Heterodera_glycines_Contig3451,Heterodera_glycines_Contig1663
40	Insulin signaling pathway	4	Ancylostoma_caninum_Contig6693,Xiphinema_index_Contig1097,Trichuris_muris_Contig274,Xiphinema_index_Contig1162
41	Cell adhesion molecules (CAMs)	3	Strongyloides_stercoralis_Contig432,Xiphinema_index_Contig866,Brugia_malayi_Contig1100
42	Fatty acid elongation in mitochondria	3	Trichinella_spiralis_Contig3032,Trichinella_spiralis_Contig1473,Ascaris_suum_Contig623
43	Aminosugars metabolism	3	Meloidogyne_chitwoodi_Contig554,Meloidogyne_arenaria_Contig178,Meloidogyne_hapla_Contig1081
44	Huntington's disease	3	Ancylostoma_caninum_Contig4584,Xiphinema_index_Contig1097,Xiphinema_index_Contig1162
45	Reductive carboxylate cycle (CO2 fixation)	3	Onchocerca_volvulus_Contig962,Ancylostoma_caninum_Contig7345,Ancylostoma_ceylanicum_Contig153
46	Galactose metabolism	3	Heterodera_glycines_Contig921,Ascaris_suum_Contig2020,Heterodera_glycines_Contig457
47	Glycine, serine and threonine metabolism	3	Ancylostoma_caninum_Contig8229,Heterodera_glycines_Contig921,Haemonchus_contortus_Contig754
48	PPAR signaling pathway	3	Globodera_rostochiensis_Contig1608,Ancylostoma_caninum_Contig2869,Ancylostoma_caninum_Contig8713
49	Glutamate metabolism	3	Ancylostoma_caninum_Contig8094;,Ascaris_suum_Contig1960,Heterodera_glycines_Contig449
50	Epithelial cell signaling in Helicobacter pylori infection	3	Meloidogyne_hapla_Contig1559,Heterodera_glycines_Contig1455,Haemonchus_contortus_Contig755
51	Proteasome	3	Nippostrongylus_brasiliensis_Contig922,Globodera_rostochiensis_Contig1416,Ascaris_suum_Contig1668
52	Phosphatidylinositol signaling system	3	Xiphinema_index_Contig1162,Xiphinema_index_Contig1097,Haemonchus_contortus_Contig1085
53	Long-term potentiation	3	Xiphinema_index_Contig1162,Xiphinema_index_Contig1097,Meloidogyne_chitwoodi_Contig864
54	Hematopoietic cell lineage	2	Strongyloides_stercoralis_Contig432,Ascaris_suum_Contig2671
55	Cyanoamino acid metabolism	2	Ancylostoma_caninum_Contig2301,Ancylostoma_caninum_Contig392
56	Alkaloid biosynthesis II	2	Ancylostoma_caninum_Contig4575,Haemonchus_contortus_Contig218
57	Valine, leucine and isoleucine biosynthesis	2	Radopholus_similis_Contig152,Heterodera_glycines_Contig2088
58	Other transporters	2	Ancylostoma_caninum_Contig2869,Ancylostoma_caninum_Contig8713
59	Androgen and estrogen metabolism	2	Heterodera_glycines_Contig3104,Globodera_rostochiensis_Contig1799
60	Porphyrin and chlorophyll metabolism	2	Heterodera_glycines_Contig3104,Globodera_rostochiensis_Contig1799
61	Pentose and glucuronate interconversions	2	Heterodera_glycines_Contig3104,Globodera_rostochiensis_Contig1799
62	TGF-beta signaling pathway	2	Ancylostoma_caninum_Contig10055,Trichinella_spiralis_Contig3099
63	Carbon fixation	2	Onchocerca_volvulus_Contig962,Ascaris_suum_Contig2628
64	Pentose phosphate pathway	2	Ancylostoma_caninum_Contig2722;,Ascaris_suum_Contig2628
65	ABC transporters	2	Ancylostoma_caninum_Contig7684;,Heterodera_schachtii_Contig98
66	Pyruvate metabolism	2	Haemonchus_contortus_Contig738,Onchocerca_volvulus_Contig962
67	Tyrosine metabolism	2	Heterodera_glycines_Contig1955,Heterodera_glycines_Contig496
68	Arginine and proline metabolism	2	Ascaris_suum_Contig1960,Haemonchus_contortus_Contig754
69	mTOR signaling pathway	2	Nippostrongylus_brasiliensis_Contig773,Ancylostoma_caninum_Contig6693
70	Metabolism of xenobiotics by cytochrome P450	2	Heterodera_glycines_Contig3104,Globodera_rostochiensis_Contig1799
71	Cell cycle - yeasts	2	Ancylostoma_caninum_Contig3152,Ancylostoma_caninum_Contig7378
72	Olfactory transduction	2	Xiphinema_index_Contig1162,Xiphinema_index_Contig1097
73	Butanoate metabolism	2	Heterodera_glycines_Contig921,Heterodera_glycines_Contig2088
74	Lysine degradation	2	Heterodera_glycines_Contig921,Meloidogyne_incognita_Contig1102
75	Focal adhesion	2	Nippostrongylus_brasiliensis_Contig773,Strongyloides_stercoralis_Contig432
76	Fatty acid metabolism	2	Globodera_rostochiensis_Contig1608,Ancylostoma_caninum_Contig2869
77	Wnt signaling pathway	2	Ancylostoma_caninum_Contig3152,Meloidogyne_chitwoodi_Contig864
78	Gap junction	2	Dictyocaulus_viviparus_Contig73,Ascaris_suum_Contig1543
79	Glycosphingolipid biosynthesis - lactoseries	1	Heterodera_glycines_Contig2175
80	Keratan sulfate biosynthesis	1	Ancylostoma_caninum_Contig6919
81	Retinol metabolism	1	Heterodera_glycines_Contig377
82	C5-Branched dibasic acid metabolism	1	Heterodera_glycines_Contig2088
83	Terpenoid biosynthesis	1	Trichuris_vulpis_Contig134
84	Cytokine-cytokine receptor interaction	1	Nippostrongylus_brasiliensis_Contig773
85	Glycosylphosphatidylinositol(GPI)-anchor biosynthesis	1	Heterodera_glycines_Contig2513
86	D-Arginine and D-ornithine metabolism	1	Haemonchus_contortus_Contig754
87	Biosynthesis of vancomycin group antibiotics	1	Ancylostoma_caninum_Contig4809
88	Cell division	1	Heterodera_glycines_Contig1353
89	Biosynthesis of steroids	1	Trichuris_vulpis_Contig134
90	Polyketide sugar unit biosynthesis	1	Ancylostoma_caninum_Contig4809
91	D-Glutamine and D-glutamate metabolism	1	Ascaris_suum_Contig1960
92	Styrene degradation	1	Heterodera_glycines_Contig1955
93	ECM-receptor interaction	1	Strongyloides_stercoralis_Contig432
94	Glycosaminoglycan degradation	1	Ancylostoma_caninum_Contig6242;
95	Sulfur metabolism	1	Meloidogyne_incognita_Contig1710;
96	Tetrachloroethene degradation	1	Heterodera_glycines_Contig921
97	Peptidoglycan biosynthesis	1	Ancylostoma_caninum_Contig8094;
98	Taurine and hypotaurine metabolism	1	Ancylostoma_caninum_Contig392
99	Parkinson's disease	1	Ancylostoma_caninum_Contig5225
100	Bisphenol A degradation	1	Heterodera_glycines_Contig921
101	Streptomycin biosynthesis	1	Ancylostoma_caninum_Contig4809
102	N-Glycan degradation	1	Meloidogyne_hapla_Contig2398
103	Glyoxylate and dicarboxylate metabolism	1	Onchocerca_volvulus_Contig962
104	Toll-like receptor signaling pathway	1	Ancylostoma_caninum_Contig3221
105	Pantothenate and CoA biosynthesis	1	Heterodera_glycines_Contig2088
106	B cell receptor signaling pathway	1	Meloidogyne_chitwoodi_Contig864
107	O-Glycan biosynthesis	1	Globodera_pallida_Contig133
108	Biotin metabolism	1	Meloidogyne_incognita_Contig1102
109	Urea cycle and metabolism of amino groups	1	Ascaris_suum_Contig1960
110	Two-component system	1	Ancylostoma_caninum_Contig8094;
111	Phenylalanine, tyrosine and tryptophan biosynthesis	1	Heterodera_glycines_Contig3707
112	Natural killer cell mediated cytotoxicity	1	Meloidogyne_chitwoodi_Contig864
113	Phenylalanine metabolism	1	Heterodera_glycines_Contig496
114	Pancreatic cancer	1	Nippostrongylus_brasiliensis_Contig773
115	Protein export	1	Haemonchus_contortus_Contig311
116	Ubiquitin mediated proteolysis	1	Ancylostoma_caninum_Contig3152
117	T cell receptor signaling pathway	1	Meloidogyne_chitwoodi_Contig864
118	Axon guidance	1	Meloidogyne_chitwoodi_Contig864
119	beta-Alanine metabolism	1	Globodera_rostochiensis_Contig1608
120	Sphingolipid metabolism	1	Ancylostoma_caninum_Contig1910;
121	Folate biosynthesis	1	Haemonchus_contortus_Contig352
122	Stilbene, coumarine and lignin biosynthesis	1	Ancylostoma_caninum_Contig2301
123	Adipocytokine signaling pathway	1	Ancylostoma_caninum_Contig2869
124	Hedgehog signaling pathway	1	Ancylostoma_caninum_Contig3152
125	Glycerolipid metabolism	1	Trichinella_spiralis_Contig862
126	Apoptosis	1	Meloidogyne_chitwoodi_Contig864
127	Ascorbate and aldarate metabolism	1	Heterodera_glycines_Contig921
128	Bile acid biosynthesis	1	Heterodera_glycines_Contig921
129	Selenoamino acid metabolism	1	Ancylostoma_caninum_Contig392
130	Colorectal cancer	1	Trichostrongylus_vitrinus_Contig258
131	Nicotinate and nicotinamide metabolism	1	Ancylostoma_caninum_Contig9137
132	Aminoacyl-tRNA biosynthesis	1	Radopholus_similis_Contig152
133	Propanoate metabolism	1	Globodera_rostochiensis_Contig1608
134	SNARE interactions in vesicular transport	1	Meloidogyne_chitwoodi_Contig659
135	Inositol phosphate metabolism	1	Haemonchus_contortus_Contig1085
136	Valine, leucine and isoleucine degradation	1	Globodera_rostochiensis_Contig1608
137	Tryptophan metabolism	1	Heterodera_glycines_Contig1511
138	Cell cycle - mammals	1	Ancylostoma_caninum_Contig7378
	Total	573

## Sheet: Pathway Mapping with EC numbers
EST sequence ID	Description	Unique Enzyme (EC numbers for metabolic pathway members)
Ancylostoma_ceylanicum_Contig3	excretory-secretory protein 2	-
Ancylostoma_ceylanicum_Contig7	tissue inhibitor of metalloproteinase 2	-
Ancylostoma_ceylanicum_Contig10	conserved cysteine-glycine protein 2 precursor	-
Ancylostoma_ceylanicum_Contig12	non-metastatic cellsproteinexpressed in	EC:2.7.4.6,
Ancylostoma_ceylanicum_Contig20	chondroitinlycan family member (cpg-3)	-
Ancylostoma_ceylanicum_Contig28	Uncharecterized protein	-
Ancylostoma_ceylanicum_Contig33	timp metallopeptidase inhibitor 2	-
Ancylostoma_ceylanicum_Contig36	secreted protein asp-2
Ancylostoma_ceylanicum_Contig38	Uncharecterized protein
Ancylostoma_ceylanicum_Contig49	aspartyl protease inhibitor 1
Ancylostoma_ceylanicum_Contig80	orcokinin precursor
Ancylostoma_ceylanicum_Contig112	Uncharecterized protein	-
Ancylostoma_ceylanicum_Contig113	heat shock protein 70-c
Ancylostoma_ceylanicum_Contig116	ub72_deira protein dr_1172	-
Ancylostoma_ceylanicum_Contig118	prosaposin (variant gaucher disease and variant metachromatic leukodystrophy)
Ancylostoma_ceylanicum_Contig133;	Uncharecterized protein	-
Ancylostoma_ceylanicum_Contig134	Uncharecterized protein
Ancylostoma_ceylanicum_Contig144	venom-allergen-like protein family member (vap-1)	-
Ancylostoma_ceylanicum_Contig150	Uncharecterized protein
Ancylostoma_ceylanicum_Contig151	venom-allergen-like protein family member (vap-1)	-
Ancylostoma_ceylanicum_Contig153	fumarate hydratase 1	EC:4.3.2.2, EC:4.3.2.1, EC:5.5.1.2, EC:4.2.1.2, EC:4.3.1.1,
Ancylostoma_ceylanicum_Contig174	yhb8_caeel uncharacterized proteinprecursor	-
Ancylostoma_ceylanicum_Contig193	Uncharecterized protein	-
Ancylostoma_ceylanicum_Contig212	fmrfamide precursor	-
Ancylostoma_ceylanicum_Contig214	fmrfamide-related peptide precursor
Ancylostoma_ceylanicum_Contig249	protein disulfide isomerase	EC:5.3.4.1, EC:1.14.11.2, EC:2.3.2.13,
Ancylostoma_ceylanicum_Contig292	neuropeptide-like protein family member (nlp-21)	-
Ancylostoma_ceylanicum_Contig300	Uncharecterized protein	-
Ancylostoma_ceylanicum_Contig316	secreted protein asp-2	-
Ancylostoma_ceylanicum_Contig319	fmrfamide-related peptide flp-16 precursor	-
Ancylostoma_ceylanicum_Contig320	af399710_1anticoagulant peptide-1 precursor	-
Ancylostoma_ceylanicum_Contig326	fatty acid retinoid binding protein precursor
Ancylostoma_ceylanicum_Contig327	secreted protein 4 precursor	-
Ancylostoma_ceylanicum_Contig330	Uncharecterized protein	-
Ancylostoma_ceylanicum_Contig332	Uncharecterized protein	-
Ancylostoma_ceylanicum_Contig337	fatty acid retinoid binding protein precursor
Ancylostoma_ceylanicum_Contig340	c-type lectin family member (clec-88)	-
Ancylostoma_ceylanicum_Contig342	Uncharecterized protein	-
Ancylostoma_ceylanicum_Contig359	secreted protein asp-2	-
Ancylostoma_ceylanicum_Contig364	calreticulin
Ancylostoma_ceylanicum_Contig368	Uncharecterized protein	-
Ancylostoma_ceylanicum_Contig370	neuropeptide-like protein family member (nlp-10)	-
Ancylostoma_ceylanicum_Contig381	Uncharecterized protein	-
Ancylostoma_ceylanicum_Contig402	cell junction protein family member (cej-1)	-
Ancylostoma_ceylanicum_Contig407	Uncharecterized protein	-
Ancylostoma_ceylanicum_Contig424	chondroitinlycan family member (cpg-4)	-
Ancylostoma_ceylanicum_Contig432	Uncharecterized protein	-
Ancylostoma_ceylanicum_Contig434	fatty acid and retinol-binding protein 1
Ancylostoma_ceylanicum_Contig441	epididymal secretory protein e1	-
Ancylostoma_ceylanicum_Contig457;	Uncharecterized protein	-
Ancylostoma_ceylanicum_Contig458	Uncharecterized protein	-
Ancylostoma_ceylanicum_Contig461	succinate dehydrogenase subunit	EC:1.3.5.1,
Ancylostoma_ceylanicum_Contig473	secreted protein asp-2
Ancylostoma_ceylanicum_Contig474	Uncharecterized protein	-
Ancylostoma_ceylanicum_Contig475	transthyretin-like family protein	-
Ancylostoma_ceylanicum_Contig480	Uncharecterized protein	-
Ancylostoma_ceylanicum_Contig491	protein kiaa0152 precursor
Ancylostoma_ceylanicum_Contig499	succinate dehydrogenase	EC:1.3.5.1,
Ancylostoma_ceylanicum_Contig528	yfmo_caeel transthyretin-like proteinprecursor	-
Ancylostoma_ceylanicum_Contig533	aspartic protease
Ancylostoma_ceylanicum_Contig568	ylw1_caeel uncharacterized protein	-
Ancylostoma_ceylanicum_Contig574	protein	-
Ancylostoma_ceylanicum_Contig585	secreted protein 5 precursor	-
Ancylostoma_ceylanicum_Contig586	chondroitinlycan family member (cpg-4)	-
Ancylostoma_ceylanicum_Contig591	mgc108301 protein
Ancylostoma_ceylanicum_Contig599;	intracellular fatty acid binding protein
Ancylostoma_ceylanicum_Contig604	ypp3_caeel uncharacterized serine carboxypeptidaseprecursor	-
Ancylostoma_ceylanicum_Contig606	af399710_1anticoagulant peptide-1 precursor	-
Ancylostoma_ceylanicum_Contig608	transthyretin-like family protein	-
Ancylostoma_ceylanicum_Contig622	Uncharecterized protein	-
Ancylostoma_ceylanicum_Contig648	Uncharecterized protein	-
Ancylostoma_ceylanicum_Contig649	vesicular mannose-binding lectin
Ancylostoma_ceylanicum_Contig669	cathepsin l	EC:3.4.22,
Ancylostoma_ceylanicum_Contig701;	Uncharecterized protein	-
Ancylostoma_ceylanicum_Contig702	Uncharecterized protein	-
Ancylostoma_ceylanicum_Contig708	peptidylglycine alpha-amidating monooxygenase
Ancylostoma_ceylanicum_Contig713	carboxypeptidase e	EC:3.4.17.10,
Ancylostoma_ceylanicum_Contig716	Uncharecterized protein	-
Ancylostoma_ceylanicum_Contig718	yns5_caeel transthyretin-like proteinprecursor	-
Ancylostoma_ceylanicum_Contig726	non-structural protein	-
Ancylostoma_ceylanicum_Contig734	anti-coagulant protein 5 precursor	-
Ancylostoma_ceylanicum_Contig749	precursor transthyretin like protein 1	-
Ancylostoma_ceylanicum_Contig756	Uncharecterized protein	-
Ancylostoma_ceylanicum_Contig760	lwamide neuropeptide precursor protein	-
Ancylostoma_ceylanicum_Contig770	immunodominant hypodermal antigen ac16	-
Ancylostoma_ceylanicum_Contig773	vespid allergen antigen homolog	-
Ancylostoma_ceylanicum_Contig779	Uncharecterized protein	-
Ancylostoma_ceylanicum_Contig780	secreted protein 4 precursor	-
Ancylostoma_ceylanicum_Contig796;	Uncharecterized protein	-
Ancylostoma_ceylanicum_Contig799;	Uncharecterized protein	-
Ancylostoma_ceylanicum_Contig811	secreted protein 3 precursor	-
Ancylostoma_ceylanicum_Contig823	Uncharecterized protein	-
Ancylostoma_ceylanicum_Contig831;	Uncharecterized protein	-
Ancylostoma_ceylanicum_Contig833;	timp metallopeptidase inhibitor 2	-
Ancylostoma_ceylanicum_Contig837;	Uncharecterized protein	-
Ancylostoma_ceylanicum_Contig838	tissue inhibitor of metalloproteinase 2
Ancylostoma_ceylanicum_Contig851;	multiple coagulation factor deficiency 2
Ancylostoma_ceylanicum_Contig869	Uncharecterized protein	-
Ancylostoma_ceylanicum_Contig881	Uncharecterized protein	-
Ancylostoma_ceylanicum_Contig882	saposin-like protein 1	-
Ancylostoma_ceylanicum_Contig888	fatty acid and retinol-binding protein 1
Ancylostoma_ceylanicum_Contig890	Uncharecterized protein	-
Ancylostoma_ceylanicum_Contig898	Uncharecterized protein	-
Ancylostoma_ceylanicum_Contig934	Uncharecterized protein	-
Ancylostoma_ceylanicum_Contig935	fmrf-like peptide family member (flp-26)	-
Ancylostoma_ceylanicum_Contig939	Uncharecterized protein	-
Ancylostoma_ceylanicum_Contig947	Uncharecterized protein	-
Ancylostoma_ceylanicum_Contig1028	sperm activation without mating family member (swm-1)	-
Ancylostoma_ceylanicum_Contig1029	Uncharecterized protein	-
Ancylostoma_ceylanicum_Contig1030	neuropeptide-like protein family member (nlp-37)	-
Ancylostoma_ceylanicum_Contig1054	Uncharecterized protein	-
Ancylostoma_ceylanicum_Contig1072	Uncharecterized protein	-
Ancylostoma_ceylanicum_Contig1082	Uncharecterized protein	-
Ancylostoma_ceylanicum_Contig1112	yfmo_caeel transthyretin-like proteinprecursor	-
Ancylostoma_ceylanicum_Contig1135	tissue inhibitor of metalloprotease	-
Ancylostoma_ceylanicum_Contig1136	Uncharecterized protein	-
Ancylostoma_ceylanicum_Contig1138	excretory-secretory protein 2	-
Ancylostoma_ceylanicum_Contig1147	tissue inhibitor of metalloproteinase 3
Ancylostoma_ceylanicum_Contig1165;	hypothetical upf0205 proteinin chromosome v	-
Ancylostoma_ceylanicum_Contig1170	tissue inhibitor of metalloprotease	-
Ancylostoma_ceylanicum_Contig1180	tissue inhibitor of metalloprotease	-
Ancylostoma_ceylanicum_Contig1182	timp metallopeptidase inhibitor 2
Ancylostoma_ceylanicum_Contig1192	timp metallopeptidase inhibitor 2
Ancylostoma_ceylanicum_Contig1202	Uncharecterized protein	-
Ancylostoma_ceylanicum_Contig1212	Uncharecterized protein	-
Ancylostoma_ceylanicum_Contig1219	Uncharecterized protein	-
Ancylostoma_ceylanicum_Contig1221	precursor transthyretin like protein 1	-
gi|28942242|gb|CB339106.1|CB339106	Uncharecterized protein	-
gi|28942224|gb|CB339097.1|CB339097	Uncharecterized protein	-
gi|28941965|gb|CB338967.1|CB338967	Uncharecterized protein	-
gi|28941893|gb|CB338931.1|CB338931	Uncharecterized protein	-
gi|28941868|gb|CB338918.1|CB338918	Uncharecterized protein	-
gi|28941860|gb|CB338914.1|CB338914	ddomain (prokaryotic heat shock protein) family member (dnj-5)	-
gi|28560874|gb|CB277289.1|CB277289	Uncharecterized protein	-
gi|28560641|gb|CB277056.1|CB277056	Uncharecterized protein	-
gi|28560571|gb|CB276986.1|CB276986	Uncharecterized protein	-
gi|28560375|gb|CB276790.1|CB276790	cuticlin 1	-
gi|28560266|gb|CB276681.1|CB276681	tissue factor pathwayisoform cra_a
gi|28560159|gb|CB276574.1|CB276574	secreted protein 4 precursor	-
gi|28559984|gb|CB276399.1|CB276399	orcokinin precursor	-
gi|28559877|gb|CB276292.1|CB276292	Uncharecterized protein	-
gi|28559871|gb|CB276286.1|CB276286	Uncharecterized protein	-
gi|28559813|gb|CB276228.1|CB276228	procathepsin e	EC:3.4.23,
gi|28559775|gb|CB276190.1|CB276190	trehalose-6-phosphate hydrolase
gi|28559588|gb|CB276003.1|CB276003	Uncharecterized protein	-
gi|28559479|gb|CB275894.1|CB275894	a proteinin chromosome ii	-
gi|28559311|gb|CB275726.1|CB275726	neuropeptide-like protein family member (nlp-42)	-
gi|28185212|gb|CB176322.1|CB176322	Uncharecterized protein	-
gi|28185195|gb|CB176305.1|CB176305	secreted protein asp-2	-
gi|28185184|gb|CB176294.1|CB176294	Uncharecterized protein	-
gi|28185117|gb|CB176227.1|CB176227	Uncharecterized protein	-
gi|28185096|gb|CB176206.1|CB176206	venom-allergen-like protein family member (vap-1)	-
gi|28184889|gb|CB175999.1|CB175999	Uncharecterized protein	-
gi|28184850|gb|CB175960.1|CB175960	protein disulfide isomerase familymember 4
gi|28184798|gb|CB175908.1|CB175908	gamma-inducible protein 30	-
gi|28184491|gb|CB175601.1|CB175601	Uncharecterized protein	-
gi|28184470|gb|CB175580.1|CB175580	prion-like-(q n-rich)-domain-bearing protein family member (pqn-97)	-
gi|28184419|gb|CB175529.1|CB175529	subfamilymember 11
gi|28254235|gb|CB190843.1|CB190843	secreted protein 4 precursor	-
gi|28254181|gb|CB190789.1|CB190789	loc446918 protein	EC:3.1.3,
gi|28254114|gb|CB190722.1|CB190722	ecm 18
gi|28254100|gb|CB190708.1|CB190708	af339099_1transthyretin-like precursor protein	-
gi|28254054|gb|CB190662.1|CB190662	glycine cleavage system protein h	EC:2.1.2.10,
gi|28254023|gb|CB190631.1|CB190631	Uncharecterized protein	-
gi|28253964|gb|CB190572.1|CB190572	anticoagulant protein 7 precursor	-
gi|28253763|gb|CB190371.1|CB190371	secreted protein 4 precursor	-
gi|28253654|gb|CB190262.1|CB190262	Uncharecterized protein	-
gi|28253632|gb|CB190240.1|CB190240	cu zn superoxide dismutase
gi|28253541|gb|CB190149.1|CB190149	nicotinic acetylcholine receptor alpha6 subunit
gi|28253434|gb|CB190042.1|CB190042	Uncharecterized protein	-
gi|28253362|gb|CB189970.1|CB189970	Uncharecterized protein	-
gi|28253279|gb|CB189887.1|CB189887	aspartic protease	EC:3.4.23,
gi|28253090|gb|CB189698.1|CB189698	Uncharecterized protein	-
gi|28253055|gb|CB189663.1|CB189663	mannose-isoform cra_b
gi|28185342|gb|CB176452.1|CB176452	cysteine proteinase
gi|28184661|gb|CB175771.1|CB175771	Uncharecterized protein
gi|28184292|gb|CB175402.1|CB175402	cardiac calumenin
gi|28183906|gb|CB175016.1|CB175016	Uncharecterized protein	-
gi|28183860|gb|CB174970.1|CB174970	Uncharecterized protein	-
gi|28183829|gb|CB174939.1|CB174939	superoxide dismutase	EC:1.15.1.1,
gi|28183652|gb|CB174813.1|CB174813	metalloprotease 1 precursor
gi|28183547|gb|CB174768.1|CB174768	fructose--bisphosphatase 2	EC:3.1.3.46, EC:3.1.3.11,
gi|28183537|gb|CB174762.1|CB174762	Uncharecterized protein	-
gi|28183418|gb|CB174718.1|CB174718	Uncharecterized protein	-
gi|24772961|gb|CA408129.1|CA408129	Uncharecterized protein	-
gi|24559400|gb|CA341304.1|CA341304	Uncharecterized protein	-
gi|24330256|gb|CA033276.1|CA033276	desmoplakin isoform ii isoform 1
gi|24330138|gb|CA033196.1|CA033196	Uncharecterized protein	-
gi|24330107|gb|CA033172.1|CA033172	neuropeptide-like protein family member (nlp-38)	-
gi|23811302|gb|BU781043.1|BU781043	yh82_caeel uncharacterized protein	-
gi|23811115|gb|BU780965.1|BU780965	nit protein 1	EC:3.6.1.29,
gi|20661881|gb|BQ289345.1|BQ289345	transthyretin-related family domain protein 36	-
gi|20500312|gb|BQ275242.1|BQ275242	Uncharecterized protein	-
gi|20500064|gb|BQ274994.1|BQ274994	Uncharecterized protein	-
gi|20499822|gb|BQ274752.1|BQ274752	Uncharecterized protein	-
gi|18815929|gb|BM536480.1|BM536480	Uncharecterized protein	-
gi|18815901|gb|BM536463.1|BM536463	Uncharecterized protein	-
gi|18815866|gb|BM536444.1|BM536444	tissue inhibitor of metalloprotease	-
gi|17125743|gb|BM131191.1|BM131191	Uncharecterized protein	-
gi|17125690|gb|BM131138.1|BM131138	af399936_1trypsin-like inhibitor protein precursor
gi|17125648|gb|BM131096.1|BM131096	multiple coagulation factor deficiency 2
gi|17125531|gb|BM130979.1|BM130979	cysteine-rich venom
gi|17125447|gb|BM130895.1|BM130895	cell junction protein family member (cej-1)
gi|17125399|gb|BM130847.1|BM130847	excretory-secretory protein 2	-
gi|17125381|gb|BM130829.1|BM130829	Uncharecterized protein	-
gi|17125326|gb|BM130774.1|BM130774	deoxyribonuclease ii beta
gi|17125321|gb|BM130769.1|BM130769	Uncharecterized protein	-
gi|17125187|gb|BM130635.1|BM130635	Uncharecterized protein	-
gi|17125169|gb|BM130617.1|BM130617	transcription factor iib
gi|17125054|gb|BM130502.1|BM130502	Uncharecterized protein	-
gi|15667101|gb|BI704883.1|BI704883	cysteine proteinase
gi|15667044|gb|BI704826.1|BI704826	six-cysteine containing astacin protease 3	EC:3.4.24,
Ascaris_lumbricoides_Contig21	transthyretin-like family protein	-
Ascaris_lumbricoides_Contig29	aigh-resolution structure of ascaris trypsin inhibitor in solution: direct evidence for a ph induced conformational transition in the reactive site
Ascaris_lumbricoides_Contig47	abundant larval transcript-2 protein	-
Ascaris_lumbricoides_Contig76	aolution structurentibacterial peptide isolated from aascaris suum	-
Ascaris_lumbricoides_Contig100	Uncharecterized protein	-
Ascaris_lumbricoides_Contig136	transthyretin-like family protein	-
Ascaris_lumbricoides_Contig141	aolution structurentibacterial peptide isolated from aascaris suum	-
Ascaris_lumbricoides_Contig156	cecropin p2	-
Ascaris_lumbricoides_Contig184	lysozyme 1
Ascaris_lumbricoides_Contig203	sxp ral-2 family protein 2 isoform 1	-
Ascaris_lumbricoides_Contig220	Uncharecterized protein	-
gi|23260856|gb|BU586891.1|BU586891	cecropin p1	-
gi|23260826|gb|BU586861.1|BU586861	cecropin p3	-
gi|23260723|gb|BU586758.1|BU586758	cecropin p3	-
gi|23260095|gb|BU586130.1|BU586130	Uncharecterized protein	-
gi|23260015|gb|BU586050.1|BU586050	Uncharecterized protein	-
gi|23259594|gb|BU585629.1|BU585629	nematode cuticle collagen n-terminal domain containing protein
gi|23259555|gb|BU585590.1|BU585590	acterial factor related family member (abf-2)	-
Brugia_malayi_Contig44	vesicular glutamate transporter 3
Brugia_malayi_Contig65	Uncharecterized protein	-
Brugia_malayi_Contig74	peptidylglycine alpha-hydroxylating monooxygenase	EC:1.14.17,
Brugia_malayi_Contig83	plasma glutamate carboxypeptidase
Brugia_malayi_Contig91	mesoderm development candidate 2
Brugia_malayi_Contig101	zinc finger protein unc-	-
Brugia_malayi_Contig175	Uncharecterized protein	-
Brugia_malayi_Contig215	Uncharecterized protein	-
Brugia_malayi_Contig222	l-isoaspartyl protein carboxyl methyltransferase	EC:2.1.1,
Brugia_malayi_Contig236	Uncharecterized protein	-
Brugia_malayi_Contig244	abundant larval transcript-2 protein	-
Brugia_malayi_Contig259;	membrane-associated dhhc5 zinc finger protein
Brugia_malayi_Contig288	Uncharecterized protein	-
Brugia_malayi_Contig392	amyloid precursor-like family member (apl-1)
Brugia_malayi_Contig394	Uncharecterized protein	-
Brugia_malayi_Contig412	galectin family member (lec-3)
Brugia_malayi_Contig413	ylw1_caeel uncharacterized protein	-
Brugia_malayi_Contig416	cathepsin a	EC:3.4.16,
Brugia_malayi_Contig497	notch-like protein	-
Brugia_malayi_Contig542	fatty acid binding proteinbrain
Brugia_malayi_Contig561	cg5422-isoform b
Brugia_malayi_Contig589	transthyretin-like family protein	-
Brugia_malayi_Contig620	cathepsin f-like cysteine	EC:3.4.22,
Brugia_malayi_Contig674	calnexin
Brugia_malayi_Contig690	Uncharecterized protein	-
Brugia_malayi_Contig705	tetratricopeptide repeat domain 7b	-
Brugia_malayi_Contig765	Uncharecterized protein	-
Brugia_malayi_Contig767	Uncharecterized protein	-
Brugia_malayi_Contig770	ferredoxin 1
Brugia_malayi_Contig793	af17 b	-
Brugia_malayi_Contig813	transthyretin-like protein 2 precursor	-
Brugia_malayi_Contig822	Uncharecterized protein	-
Brugia_malayi_Contig840	transthyretin-like family protein	-
Brugia_malayi_Contig897	ing defective family member (mlt-8)	-
Brugia_malayi_Contig973	transthyretin-like family protein	-
Brugia_malayi_Contig986	aspartyl protease inhibitor 1
Brugia_malayi_Contig1076	Uncharecterized protein	-
Brugia_malayi_Contig1100	mhc class ii antigen
Brugia_malayi_Contig1113	interferon gamma inducible protein 30
Brugia_malayi_Contig1153	splicing factorsubunit10kda
Brugia_malayi_Contig1157;	Uncharecterized protein	-
Brugia_malayi_Contig1235	Uncharecterized protein	-
Brugia_malayi_Contig1246	secreted protein acidic and rich in cysteine	-
Brugia_malayi_Contig1265	Uncharecterized protein	-
Brugia_malayi_Contig1283	major microfilarial sheath protein	-
Brugia_malayi_Contig1488	transthyretin-like protein 3 precursor	-
Brugia_malayi_Contig1490	af177194_1cystatin-type cysteine proteinase inhibitor cpi-1	-
Brugia_malayi_Contig1498	Uncharecterized protein	-
Brugia_malayi_Contig1514	carbonic anhydrase vii
Brugia_malayi_Contig1522	Uncharecterized protein	-
Brugia_malayi_Contig1543	heavy neurofilament	-
Brugia_malayi_Contig1573	Uncharecterized protein	-
Brugia_malayi_Contig1581	ribonuclease t2
Brugia_malayi_Contig1599	ring finger2
Brugia_malayi_Contig1601	secretogranin v
Brugia_malayi_Contig1642	ribosomal protein l3	EC:3.6.5.3,
Brugia_malayi_Contig1653	transmembrane emp24 domain trafficking protein 2
Brugia_malayi_Contig1725	calumenin
Brugia_malayi_Contig1761	heat shock protein 70-c
Brugia_malayi_Contig1823	fk506-binding protein	EC:5.2.1.8,
Brugia_malayi_Contig1839	glutathione peroxidase	EC:1.11.1.9,
Brugia_malayi_Contig1841	Uncharecterized protein	-
Brugia_malayi_Contig1868	Uncharecterized protein	-
Brugia_malayi_Contig1922	Uncharecterized protein	-
Brugia_malayi_Contig1923	domain containing protein	-
Brugia_malayi_Contig1940	Uncharecterized protein	-
Brugia_malayi_Contig1947	complement component 4 bindingbeta
Brugia_malayi_Contig1984	Uncharecterized protein	-
Brugia_malayi_Contig1998	24 kda secreted protein	-
Brugia_malayi_Contig2028	Uncharecterized protein	-
Brugia_malayi_Contig2061	2h2 type family protein	-
Brugia_malayi_Contig2071	dolichyl-diphosphooligosaccharide-protein glycosyltransferase	EC:2.4.1.119,
Brugia_malayi_Contig2142	cathepsin l-like	EC:3.4.22.15,
Brugia_malayi_Contig2144	gnl3 protein
Brugia_malayi_Contig2150	Uncharecterized protein	-
Brugia_malayi_Contig2158	hypothetical upf0205 proteinin chromosome iii	-
Brugia_malayi_Contig2163	yqp5_caeeluncharacterized protein	-
Brugia_malayi_Contig2195	abundant larval transcript-2 protein	-
Brugia_malayi_Contig2220	glutathione-s-transferase homolog	-
Brugia_malayi_Contig2255	peptidyl-prolyl cis-trans isomerase	EC:5.2.1.8,
Brugia_malayi_Contig2261	calreticulin
Brugia_malayi_Contig2273	Uncharecterized protein	-
Brugia_malayi_Contig2274	Uncharecterized protein	-
Brugia_malayi_Contig2282	troponin family protein	-
gi|28941144|gb|CB338558.1|CB338558	db module family protein	-
gi|10172463|gb|BE758471.1|BE758471	Uncharecterized protein	-
gi|10172428|gb|BE758436.1|BE758436	cuticlin 1	-
gi|8050252|gb|AW888228.1|AW888228	cytochrome p450 family protein
gi|8012684|gb|AW874968.1|AW874968	Uncharecterized protein	-
gi|8012444|gb|AW874773.1|AW874773	transthyretin-like family protein	-
gi|7545462|gb|AW675976.1|AW675976	a proteinin chromosome	-
gi|6934987|gb|AW409449.1|AW409449	hyaluronoglucosaminidase 1	-
gi|6587663|gb|AW244981.1|AW244981	recombinant antigenidentical	-
gi|6445598|gb|AW179561.1|AW179561	calcium-binding mitochondrial protein anon-	-
gi|6159926|gb|AW140208.1|AW140208	plasmid maintenance protein containing protein	-
gi|6009363|gb|AW061619.1|AW061619	potassium-chloride cotransporter
gi|6009285|gb|AW061541.1|AW061541	Uncharecterized protein	-
gi|6009258|gb|AW061514.1|AW061514	a proteinin chromosome ii
gi|5639580|gb|AI919725.1|AI919725	cg7879-isoform a
gi|5342866|gb|AI795180.1|AI795180	Uncharecterized protein	-
gi|3818249|gb|AI234369.1|AI234369	abundant larval transcript-2 protein	-
gi|3450689|gb|AI105524.1|AI105524	Uncharecterized protein	-
gi|3445034|gb|AI096245.1|AI096245	Uncharecterized protein	-
gi|3426589|gb|AI087578.1|AI087578	af326938_1 xg314
gi|3426431|gb|AI087726.1|AI087726	Uncharecterized protein	-
gi|3331895|gb|AI058029.1|AI058029	Uncharecterized protein	-
gi|3177600|gb|AA991111.1|AA991111	Uncharecterized protein	-
gi|3177539|gb|AA991050.1|AA991050	kelch-like 18	-
gi|3177476|gb|AA990987.1|AA990987	Uncharecterized protein	-
gi|3177470|gb|AA990981.1|AA990981	prion-like-(q n-rich)-domain-bearing protein family member (pqn-34)	-
gi|2924065|gb|AA842729.1|AA842729	hint module family protein
gi|2924021|gb|AA842685.1|AA842685	stromal cell-derived factor 2-like 1
gi|2923626|gb|AA842290.1|AA842290	Uncharecterized protein	-
gi|2923505|gb|AA842169.1|AA842169	Uncharecterized protein	-
gi|2922189|gb|AA840853.1|AA840853	bowman-birk serine protease inhibitor	-
gi|2854255|gb|AA791294.1|AA791294	Uncharecterized protein	-
gi|2746982|gb|AA727992.1|AA727992	Uncharecterized protein	-
gi|2393043|gb|AA585631.1|AA585631	a proteinin chromosome ii	-
gi|2392996|gb|AA585584.1|AA585584	epididymal secretory protein e1	-
gi|2605428|gb|AA661384.1|AA661384	lobulin-like cell adhesion molecule family member (igcm-1)	-
gi|2113570|gb|AA430888.1|AA430888	acyl carrier protein	EC:1.6.5.3,
gi|2113560|gb|AA430878.1|AA430878	Uncharecterized protein	-
gi|2429563|gb|AA598370.1|AA598370	Uncharecterized protein	-
gi|2315054|gb|AA547853.1|AA547853	Uncharecterized protein	-
gi|1917136|gb|AA275488.1|AA275488	Uncharecterized protein	-
gi|1917123|gb|AA275475.1|AA275475	signal sequencebeta (translocon-associated protein beta)
gi|2369508|gb|AA584955.1|AA584955	Uncharecterized protein	-
gi|2345203|gb|AA570910.1|AA570910	serpin precursor
gi|2307144|gb|AA545853.1|AA545853	Uncharecterized protein	-
gi|2247072|gb|AA509195.1|AA509195	Uncharecterized protein	-
gi|2247000|gb|AA509123.1|AA509123	Uncharecterized protein	-
gi|2246907|gb|AA509030.1|AA509030	superoxide dismutase
gi|2209401|gb|AA480703.1|AA480703	immunoglobulin lambda light chain	-
gi|2199358|gb|AA471594.1|AA471594	novel proteinvertebrate glycosyltransferase 25 domain containing 1
gi|2153608|gb|AA441730.1|AA441730	calsequestrin family protein
gi|2064822|gb|AA406843.1|AA406843	lysosomal alpha-mannosidase (mannosidase alpha class 2b member 1)	EC:3.2.1.24,
gi|2064800|gb|AA406821.1|AA406821	Uncharecterized protein	-
gi|1911903|gb|AA272976.1|AA272976	Uncharecterized protein	-
gi|1892892|gb|AA257253.1|AA257253	hypothetical upf0205 proteinin chromosome iii	-
gi|1854993|gb|AA232030.1|AA232030	Uncharecterized protein	-
gi|1849766|gb|AA228208.1|AA228208	Uncharecterized protein	-
gi|1849758|gb|AA228200.1|AA228200	Uncharecterized protein	-
gi|1799499|gb|AA203756.1|AA203756	Uncharecterized protein	-
gi|1737570|gb|AA161560.1|AA161560	Uncharecterized protein	-
gi|1397356|gb|W84899.1|W84899	lysozyme 2	-
gi|1236226|gb|N74827.1|N74827	Uncharecterized protein	-
gi|1236211|gb|N74812.1|N74812	Uncharecterized protein	-
gi|1167374|gb|N43130.1|N43130	Uncharecterized protein
gi|1141655|gb|N27307.1|N27307	sh3 domain-binding protein	-
Necator_americanus_Contig3	acp24a4
Necator_americanus_Contig4;	lysozyme family member (lys-8)
Necator_americanus_Contig13	amyloid betaprecursorisoform cra_a
Necator_americanus_Contig14;	Uncharecterized protein	-
Necator_americanus_Contig22	Uncharecterized protein	-
Necator_americanus_Contig56	24 kda secreted protein	-
Necator_americanus_Contig64	neuropeptide-like protein family member (nlp-18)	-
Necator_americanus_Contig69	Uncharecterized protein	-
Necator_americanus_Contig81	tissue inhibitor of metalloproteinase 2b
Necator_americanus_Contig97	Uncharecterized protein
Necator_americanus_Contig101	Uncharecterized protein	-
Necator_americanus_Contig103	Uncharecterized protein	-
Necator_americanus_Contig107	Uncharecterized protein	-
Necator_americanus_Contig110	Uncharecterized protein	-
Necator_americanus_Contig128	fmrfamide-like peptide 8
Necator_americanus_Contig132	ubiquinol-cytochrome c oxidoreductase complex family member (ucr-)
Necator_americanus_Contig134	Uncharecterized protein	-
Necator_americanus_Contig135	fmrfamide-related peptide flp-16 precursor	-
Necator_americanus_Contig148	Uncharecterized protein	-
Necator_americanus_Contig151	Uncharecterized protein	-
Necator_americanus_Contig164	Uncharecterized protein	-
Necator_americanus_Contig196;	Uncharecterized protein	-
Necator_americanus_Contig247	neuropeptide-like protein family member (nlp-12)
Necator_americanus_Contig252	Uncharecterized protein	-
Necator_americanus_Contig267	fmrfamide-like peptide 9	-
Necator_americanus_Contig269	Uncharecterized protein	-
Necator_americanus_Contig281	fmrfamide-related peptide precursor
Necator_americanus_Contig289	secreted protein asp-2
Necator_americanus_Contig333	Uncharecterized protein	-
Necator_americanus_Contig384	fmrfamide-like peptide 8
Necator_americanus_Contig397;	Uncharecterized protein	-
Necator_americanus_Contig403	metalloprotease 1 precursor	EC:3.4.24,
Necator_americanus_Contig405	carboxypeptidase e	EC:3.4.17.10,
Necator_americanus_Contig409	Uncharecterized protein	-
Necator_americanus_Contig434	Uncharecterized protein	-
Necator_americanus_Contig446	orcokinin precursor
Necator_americanus_Contig476	Uncharecterized protein	-
Necator_americanus_Contig525	signal sequencedelta
Necator_americanus_Contig528	Uncharecterized protein	-
Necator_americanus_Contig536	fmrf-like peptide family member (flp-13)
Necator_americanus_Contig549	cytochrome p450 family member (cyp-34a4)	-
Necator_americanus_Contig557	secretogranin v
Necator_americanus_Contig566	secreted protein 4 precursor	-
Necator_americanus_Contig569	glycosyl hydrolases family 25 protein
Necator_americanus_Contig570	venom-allergen-like protein family member (vap-1)	-
Necator_americanus_Contig572	amyloid betaprecursor-like proteinisoform cra_a
Necator_americanus_Contig573	Uncharecterized protein	-
Necator_americanus_Contig576	Uncharecterized protein	-
Necator_americanus_Contig579	24 kda excretory secretory protein	-
Necator_americanus_Contig582	Uncharecterized protein	-
Necator_americanus_Contig589	Uncharecterized protein	-
Necator_americanus_Contig590	venom-allergen-like protein family member (vap-1)	-
Necator_americanus_Contig604	24 kda excretory secretory protein	-
Necator_americanus_Contig605	phospholipase a2	-
Necator_americanus_Contig610	lysozyme family member (lys-8)
Necator_americanus_Contig626	Uncharecterized protein	-
Necator_americanus_Contig656	yfmo_caeel transthyretin-like proteinprecursor	-
Necator_americanus_Contig671	immunodominant hypodermal antigen ac16	-
Necator_americanus_Contig710	dmon2_caeel domon domain-containing proteinprecursor	-
Necator_americanus_Contig711	fatty acid and retinol-binding protein 1
Necator_americanus_Contig714	Uncharecterized protein	-
Necator_americanus_Contig718	secreted protein 5 precursor	-
gi|85484648|gb|DW677768.1|DW677768	glycosyl hydrolases family 25 protein
gi|23378846|gb|BU666660.1|BU666660	Uncharecterized protein	-
gi|23378609|gb|BU666423.1|BU666423	Uncharecterized protein	-
gi|23378470|gb|BU666284.1|BU666284	Uncharecterized protein	-
gi|23378419|gb|BU666244.1|BU666244	hypothetical upf0205 proteinin chromosome iii	-
gi|23378413|gb|BU666238.1|BU666238	Uncharecterized protein	-
gi|23378240|gb|BU666054.1|BU666054	Uncharecterized protein	-
gi|22530262|gb|BU089073.1|BU089073	Uncharecterized protein	-
gi|22530229|gb|BU089040.1|BU089040	Uncharecterized protein	-
gi|22529880|gb|BU088691.1|BU088691	cg4357-isoform a
gi|22529868|gb|BU088679.1|BU088679	Uncharecterized protein	-
gi|22529662|gb|BU088483.1|BU088483	Uncharecterized protein	-
gi|22529623|gb|BU088434.1|BU088434	Uncharecterized protein	-
gi|22529501|gb|BU088312.1|BU088312	Uncharecterized protein	-
gi|22529366|gb|BU088177.1|BU088177	Uncharecterized protein	-
gi|22529069|gb|BU087880.1|BU087880	Uncharecterized protein	-
gi|22528992|gb|BU087803.1|BU087803	fmrf-like peptide family member (flp-26)	-
gi|22528985|gb|BU087796.1|BU087796	Uncharecterized protein	-
gi|22528971|gb|BU087782.1|BU087782	phosphatidylethanolamine-binding protein	-
gi|22528907|gb|BU087718.1|BU087718	Uncharecterized protein	-
gi|22528852|gb|BU087663.1|BU087663	homolog of odr-2family member (hot-7)	-
gi|22528746|gb|BU087557.1|BU087557	Uncharecterized protein	-
gi|22528739|gb|BU087550.1|BU087550	u40417_5 transthyretin-related family domain protein 30	-
gi|22528735|gb|BU087546.1|BU087546	transthyretin-related family domain protein 47	-
gi|22528669|gb|BU087491.1|BU087491	tfamily of potassium channels family member (twk-44)	-
gi|22528434|gb|BU087245.1|BU087245	phospholipasegroup ib
gi|22528409|gb|BU087220.1|BU087220	transthyretin-like family protein	-
gi|22528379|gb|BU087190.1|BU087190	secreted protein asp-2
gi|22528343|gb|BU087154.1|BU087154	hypothetical upf0205 proteinin chromosome iii	-
gi|22528257|gb|BU087068.1|BU087068	neuropeptide-like protein family member (nlp-9)	-
gi|22528176|gb|BU086987.1|BU086987	Uncharecterized protein	-
gi|22528161|gb|BU086972.1|BU086972	Uncharecterized protein	-
gi|22528002|gb|BU086813.1|BU086813	yfmo_caeel transthyretin-like proteinprecursor	-
gi|22527970|gb|BU086781.1|BU086781	tissue inhibitor of metalloproteinase 3	-
gi|22527959|gb|BU086770.1|BU086770	Uncharecterized protein	-
gi|14020778|gb|BG734494.1|BG734494	venom-allergen-like protein family member (vap-1)	-
gi|14020776|gb|BG734492.1|BG734492	cysteine protease inhibitor family member (cpi-2)
gi|14020769|gb|BG734485.1|BG734485	Uncharecterized protein	-
gi|14020753|gb|BG734469.1|BG734469	Uncharecterized protein	-
gi|13418524|gb|BG467920.1|BG467920	sperm activation without mating family member (swm-1)
gi|13418461|gb|BG467857.1|BG467857	Uncharecterized protein	-
gi|13418421|gb|BG467817.1|BG467817	Uncharecterized protein	-
gi|13418380|gb|BG467776.1|BG467776	Uncharecterized protein	-
gi|13418219|gb|BG467615.1|BG467615	amyloid betaprecursor-like proteinisoform cra_a
gi|13418190|gb|BG467586.1|BG467586	Uncharecterized protein	-
gi|13418161|gb|BG467557.1|BG467557	Uncharecterized protein	-
gi|13418159|gb|BG467555.1|BG467555	amyloid betaprecursor-like proteinisoform cra_a
gi|5510744|gb|AI857128.1|AI857128	Uncharecterized protein	-
gi|5510694|gb|AI857078.1|AI857078	Uncharecterized protein	-
gi|5510666|gb|AI857050.1|AI857050	chromosome 9 open reading frame 4	-
gi|5510663|gb|AI857047.1|AI857047	vespid allergen antigen homolog	-
gi|5510637|gb|AI857021.1|AI857021	Uncharecterized protein	-
gi|5510623|gb|AI857007.1|AI857007	Uncharecterized protein	-
gi|5510596|gb|AI856980.1|AI856980	c-type lectin family member (clec-88)
gi|5510566|gb|AI856950.1|AI856950	mgc108301 protein
gi|5510562|gb|AI856946.1|AI856946	yhb8_caeel uncharacterized proteinprecursor	-
Onchocerca_ochengi_Contig3	abundant larval transcript-2protein	-
Onchocerca_volvulus_Contig43	osin-like protein family member (spp-10)	-
Onchocerca_volvulus_Contig57	nematode cuticle collagen n-terminal domain containing protein
Onchocerca_volvulus_Contig59	Uncharecterized protein	-
Onchocerca_volvulus_Contig84	calsequestrin 1
Onchocerca_volvulus_Contig104	peripheral myelin protein 2
Onchocerca_volvulus_Contig134	hypothetical upf0205 proteinin chromosome v	-
Onchocerca_volvulus_Contig145	abundant larval transcript-2protein	-
Onchocerca_volvulus_Contig209	Uncharecterized protein	-
Onchocerca_volvulus_Contig217	Uncharecterized protein	-
Onchocerca_volvulus_Contig249	ran binding protein 2
Onchocerca_volvulus_Contig270	cystatin 10
Onchocerca_volvulus_Contig295	abundant larval transcript-2 protein	-
Onchocerca_volvulus_Contig306	subfamilymember 9
Onchocerca_volvulus_Contig320	nucleosome assembly protein 1-like 1
Onchocerca_volvulus_Contig352	galectin family member (lec-3)
Onchocerca_volvulus_Contig364	Uncharecterized protein	-
Onchocerca_volvulus_Contig379	aspartyl protease inhibitor 1
Onchocerca_volvulus_Contig388	typealpha 3	-
Onchocerca_volvulus_Contig389	major microfilarial sheath protein	-
Onchocerca_volvulus_Contig395	Uncharecterized protein	-
Onchocerca_volvulus_Contig409	gaf domain containing protein	-
Onchocerca_volvulus_Contig446	plbl3_caeelphospholipase b-like 3 precursor (lamina ancestor homolog 3) (lama-like protein 3)
Onchocerca_volvulus_Contig450	ing defective family member (mlt-8)	-
Onchocerca_volvulus_Contig474	manganese superoxide dismutase
Onchocerca_volvulus_Contig489	pancreatic protein with two somatomedin b domains
Onchocerca_volvulus_Contig492	typealpha 1
Onchocerca_volvulus_Contig494	Uncharecterized protein
Onchocerca_volvulus_Contig505	thap domain containing 4	-
Onchocerca_volvulus_Contig511	Uncharecterized protein	-
Onchocerca_volvulus_Contig526	abundant larval transcript-2protein	-
Onchocerca_volvulus_Contig549	calreticulin
Onchocerca_volvulus_Contig562	glioma tumor suppressor candidate region gene 2	-
Onchocerca_volvulus_Contig590	abundant larval transcript-2protein	-
Onchocerca_volvulus_Contig607	ef hand family protein	-
Onchocerca_volvulus_Contig641	transthyretin-like family protein	-
Onchocerca_volvulus_Contig644	yol6_caeel uncharacterized protein	-
Onchocerca_volvulus_Contig645	Uncharecterized protein	-
Onchocerca_volvulus_Contig649	l-isoaspartyl protein carboxyllike
Onchocerca_volvulus_Contig651	abundant larval transcript-2protein	-
Onchocerca_volvulus_Contig668	Uncharecterized protein	-
Onchocerca_volvulus_Contig680	secreted protein acidic and rich in cysteine
Onchocerca_volvulus_Contig702	ywz3_caeel uncharacterized protein	-
Onchocerca_volvulus_Contig715	pan domain containing protein	-
Onchocerca_volvulus_Contig726	fimbrial-like adhesin protein	-
Onchocerca_volvulus_Contig730	phosphatidylethanolamine-binding protein	-
Onchocerca_volvulus_Contig772	abundant larval transcript-2 protein	-
Onchocerca_volvulus_Contig785	vespid allergen antigen homolog
Onchocerca_volvulus_Contig798	vespid allergen antigen homolog
Onchocerca_volvulus_Contig844	delta notch-like egf-related receptor	-
Onchocerca_volvulus_Contig849	surface-associated antigen 1	-
Onchocerca_volvulus_Contig855	Uncharecterized protein	-
Onchocerca_volvulus_Contig861	Uncharecterized protein	-
Onchocerca_volvulus_Contig866	abundant larval transcript-2protein	-
Onchocerca_volvulus_Contig875	cystatin e m
Onchocerca_volvulus_Contig906	brugia malayi	-
Onchocerca_volvulus_Contig909	cg31650-isoform c
Onchocerca_volvulus_Contig962	malate dehydrogenasenad	EC:1.1.1.37, EC:1.1.1.82,
Onchocerca_volvulus_Contig999	Uncharecterized protein	-
Onchocerca_volvulus_Contig1019	prion-like-(q n-rich)-domain-bearing protein family member (pqn-40)	-
Onchocerca_volvulus_Contig1024	transthyretin-like family protein	-
Onchocerca_volvulus_Contig1053	Uncharecterized protein	-
Onchocerca_volvulus_Contig1112	hypothetical upf0205 proteinin chromosome v	-
Onchocerca_volvulus_Contig1142	Uncharecterized protein	-
gi|12360045|gb|BF942770.1|BF942770	22 upper	-
gi|12045407|gb|BF727546.1|BF727546	pan domain containing protein	-
gi|11386547|gb|BF400503.1|BF400503	ribophorin ii
gi|11141085|gb|BF228720.1|BF228720	abundant larval transcript-2protein	-
gi|11091588|gb|BF199453.1|BF199453	Uncharecterized protein	-
gi|11091574|gb|BF199448.1|BF199448	Uncharecterized protein	-
gi|10841058|gb|BF064419.1|BF064419	abundant larval transcript-2protein	-
gi|10841032|gb|BF064393.1|BF064393	v-ral simian leukemia viral oncogene homolog b	EC:3.6.5.1, EC:3.6.5.2, EC:3.6.5.3, EC:3.6.5.4,
gi|10568040|gb|BE949541.1|BE949541	abundant larval transcript-2protein	-
gi|10387127|gb|BE899653.1|BE899653	abundant larval transcript-2protein	-
gi|10387125|gb|BE899652.1|BE899652	abundant larval transcript-2protein	-
gi|10190927|gb|BE760973.1|BE760973	abundant larval transcript-2protein	-
gi|10190916|gb|BE760962.1|BE760962	abundant larval transcript-2protein	-
gi|10119521|gb|BE720905.1|BE720905	abundant larval transcript-2protein	-
gi|10119514|gb|BE720898.1|BE720898	abundant larval transcript-2protein	-
gi|10119488|gb|BE720872.1|BE720872	abundant larval transcript-2protein	-
gi|10029687|gb|BE669146.1|BE669146	abundant larval transcript-2protein	-
gi|10029678|gb|BE669137.1|BE669137	abundant larval transcript-2protein	-
gi|10029673|gb|BE669132.1|BE669132	abundant larval transcript-2protein	-
gi|10029660|gb|BE669119.1|BE669119	abundant larval transcript-2protein	-
gi|10029640|gb|BE669099.1|BE669099	-	-
gi|10029636|gb|BE669095.1|BE669095	abundant larval transcript-2protein	-
gi|9919619|gb|BE636508.1|BE636508	-	-
gi|9794193|gb|BE552501.1|BE552501	abundant larval transcript-2protein	-
gi|9418344|gb|BE420518.1|BE420518	abundant larval transcript-2protein	-
gi|9255621|gb|BE346089.1|BE346089	abundant larval transcript-2 protein	-
gi|9255608|gb|BE346072.1|BE346072	af121262_1slap-1 protein	-
gi|9034203|gb|BE239239.1|BE239239	abundant larval transcript-2protein	-
gi|8249034|gb|AW990918.1|AW990918	abundant larval transcript-2protein	-
gi|8249021|gb|AW990909.1|AW990909	abundant larval transcript-2protein	-
gi|8171832|gb|AW980300.1|AW980300	abundant larval transcript-2protein	-
gi|8171770|gb|AW980239.1|AW980239	abundant larval transcript-2protein	-
gi|8171735|gb|AW980205.1|AW980205	abundant larval transcript-2protein	-
gi|8171728|gb|AW980198.1|AW980198	abundant larval transcript-2protein	-
gi|8171712|gb|AW980182.1|AW980182	abundant larval transcript-2protein	-
gi|8171700|gb|AW980170.1|AW980170	abundant larval transcript-2protein	-
gi|8171684|gb|AW980155.1|AW980155	abundant larval transcript-2protein	-
gi|8171683|gb|AW980154.1|AW980154	abundant larval transcript-2protein	-
gi|8171660|gb|AW980131.1|AW980131	abundant larval transcript-2protein	-
gi|7650639|gb|AW739480.1|AW739480	prolyl 4-hydroxylase alpha subunit	EC:1.14.11,
gi|7557546|gb|AW682831.1|AW682831	abundant larval transcript-2protein	-
gi|7557531|gb|AW682816.1|AW682816	abundant larval transcript-2protein	-
gi|7287582|gb|AW600069.1|AW600069	ov39_oncvoov39 antigen	-
gi|7212392|gb|AW562276.1|AW562276	Uncharecterized protein	-
gi|7138203|gb|AW499483.1|AW499483	Uncharecterized protein	-
gi|6994263|gb|AW453477.1|AW453477	Uncharecterized protein	-
gi|6935048|gb|AW409510.1|AW409510	Uncharecterized protein	-
gi|6742194|gb|AW313008.1|AW313008	potassium voltage-gated channel protein shal
gi|6720943|gb|AW308580.1|AW308580	Uncharecterized protein	-
gi|6580007|gb|AW244881.1|AW244881	hog (hedgehog-like family) family member (wrt-9)
gi|6579974|gb|AW244848.1|AW244848	protein kinase c substrate 80k-h	EC:3.2.1.20,
gi|6507859|gb|AW208342.1|AW208342	glycosyl hydrolase familycatalytic domain containing protein	-
gi|6507840|gb|AW208323.1|AW208323	arginine-mutated in early stage tumors
gi|4284469|gb|AI444922.1|AI444922	Uncharecterized protein	-
gi|4836977|gb|AI670471.1|AI670471	probable exocyst complex component	-
gi|4776798|gb|AI665801.1|AI665801	serine proteasekazal-type family protein
gi|4776763|gb|AI665766.1|AI665766	tenascin c	-
gi|4417356|gb|AI511502.1|AI511502	abundant larval transcript-2protein	-
gi|4295774|gb|AI438381.1|AI438381	-	-
gi|4115308|gb|AI363687.1|AI363687	Uncharecterized protein	-
gi|4056308|gb|AI322157.1|AI322157	interferon gamma inducible protein 30	-
gi|4056278|gb|AI322127.1|AI322127	Uncharecterized protein	-
gi|4033167|gb|AI317900.1|AI317900	domain containing protein
gi|4028819|gb|AI313831.1|AI313831	collagen-like protein	-
gi|3798595|gb|AI218793.1|AI218793	Uncharecterized protein	-
gi|3758524|gb|AI205462.1|AI205462	abundant larval transcript-2protein	-
gi|3758472|gb|AI205410.1|AI205410	cog3417: collagen-binding surface adhesin(antigen i ii family)	-
gi|3602917|gb|AI132901.1|AI132901	abundant larval transcript-2protein	-
gi|3602881|gb|AI132865.1|AI132865	abundant larval transcript-2protein	-
gi|3602878|gb|AI132862.1|AI132862	abundant larval transcript-2protein	-
gi|3602795|gb|AI132769.1|AI132769	abundant larval transcript-2protein	-
gi|3602788|gb|AI132762.1|AI132762	abundant larval transcript-2protein	-
gi|3602757|gb|AI132731.1|AI132731	a proteinin chromosome	-
gi|3600666|gb|AI130648.1|AI130648	abundant larval transcript-2 protein	-
gi|3600616|gb|AI130598.1|AI130598	Uncharecterized protein	-
gi|3600520|gb|AI130502.1|AI130502	vespid allergen antigen homolog
gi|3600130|gb|AI130112.1|AI130112	abundant larval transcript-2protein	-
gi|3598595|gb|AI130081.1|AI130081	abundant larval transcript-2protein	-
gi|3598590|gb|AI130076.1|AI130076	abundant larval transcript-2 protein	-
gi|3548722|gb|AI124402.1|AI124402	abundant larval transcript-2protein	-
gi|3548687|gb|AI124488.1|AI124488	abundant larval transcript-2protein	-
gi|3548684|gb|AI124485.1|AI124485	abundant larval transcript-2protein	-
gi|3540092|gb|AI124351.1|AI124351	Uncharecterized protein	-
gi|3539976|gb|AI124235.1|AI124235	abundant larval transcript-2protein	-
gi|3539955|gb|AI124214.1|AI124214	abundant larval transcript-2protein	-
gi|3539952|gb|AI124211.1|AI124211	abundant larval transcript-2 protein	-
gi|3510211|gb|AI111327.1|AI111327	abundant larval transcript-2protein	-
gi|3510165|gb|AI111281.1|AI111281	glycosylgroup 2 family protein	-
gi|3510154|gb|AI111270.1|AI111270	Uncharecterized protein	-
gi|3510129|gb|AI111245.1|AI111245	troponin c
gi|3492676|gb|AI110530.1|AI110530	Uncharecterized protein	-
gi|3444833|gb|AI096127.1|AI096127	Uncharecterized protein	-
gi|3091475|gb|AA934318.1|AA934318	Uncharecterized protein	-
gi|3091469|gb|AA934312.1|AA934312	abundant larval transcript-2protein	-
gi|3091407|gb|AA934250.1|AA934250	abundant larval transcript-2protein	-
gi|3337517|gb|AI061553.1|AI061553	abundant larval transcript-2protein	-
gi|3337473|gb|AI061509.1|AI061509	abundant larval transcript-2protein	-
gi|3337451|gb|AI061487.1|AI061487	Uncharecterized protein	-
gi|3326878|gb|AI055764.1|AI055764	abundant larval transcript-2protein	-
gi|3326877|gb|AI055763.1|AI055763	abundant larval transcript-2protein	-
gi|3326875|gb|AI055761.1|AI055761	abundant larval transcript-2 protein	-
gi|3056513|gb|AA917121.1|AA917121	abundant larval transcript-2 protein	-
gi|3055206|gb|AA915814.1|AA915814	fimbrial-like protein
gi|3043338|gb|AA907981.1|AA907981	abundant larval transcript-2protein	-
gi|2767098|gb|AA736341.1|AA736341	phosphatidylethanolamine-binding protein	-
gi|2734061|gb|AA720451.1|AA720451	abundant larval transcript-2 protein	-
gi|2734047|gb|AA720437.1|AA720437	Uncharecterized protein	-
gi|2670052|gb|AA683454.1|AA683454	abundant larval transcript-2 protein	-
gi|2664185|gb|AA682180.1|AA682180	abundant larval transcript-2protein	-
gi|2661343|gb|AA680593.1|AA680593	abundant larval transcript-2 protein	-
gi|2655601|gb|AA675937.1|AA675937	abundant larval transcript-2 protein	-
gi|2647395|gb|AA674127.1|AA674127	abundant larval transcript-2 protein	-
gi|2642395|gb|AA670518.1|AA670518	biodegradative arginine decarboxylase	EC:4.1.1.19,
gi|2642381|gb|AA670504.1|AA670504	spondin 1a	-
gi|2541848|gb|AA629461.1|AA629461	abundant larval transcript-2protein	-
gi|2528838|gb|AA624962.1|AA624962	fmrf-like peptide family member (flp-8)
gi|2522673|gb|AA618797.1|AA618797	serine carboxypeptidase s28 family protein	-
gi|2522542|gb|AA618713.1|AA618713	abundant larval transcript-2protein	-
gi|2467077|gb|AA614881.1|AA614881	abundant larval transcript-2protein	-
gi|2460490|gb|AA610991.1|AA610991	abundant larval transcript-2protein	-
gi|2460478|gb|AA610979.1|AA610979	dna translocase	-
gi|2099556|gb|AA294562.1|AA294562	von willebrand factor type a domain containing protein	-
gi|2099305|gb|AA294116.1|AA294116	protein kinase domain containing protein	-
gi|975412|gb|R95256.1|R95256	Uncharecterized protein	-
gi|940236|gb|R84208.1|R84208	abundant larval transcript-2protein	-
Strongyloides_stercoralis_Contig18	heat shock 70kda protein 5 (glucose-regulated78kda)
Strongyloides_stercoralis_Contig19	heat shock protein 70
Strongyloides_stercoralis_Contig70	thioredoxin domain containing 4 (endoplasmic reticulum)
Strongyloides_stercoralis_Contig77;	hypothetical upf0205 proteinin chromosome iii	-
Strongyloides_stercoralis_Contig86	Uncharecterized protein	-
Strongyloides_stercoralis_Contig91	heat shock protein 90kda betamember 1
Strongyloides_stercoralis_Contig109	purine ntpase	-
Strongyloides_stercoralis_Contig127	Uncharecterized protein	-
Strongyloides_stercoralis_Contig142	protein disulfide isomerase	EC:5.3.4.1, EC:1.14.11.2, EC:2.3.2.13,
Strongyloides_stercoralis_Contig162	Uncharecterized protein
Strongyloides_stercoralis_Contig202	Uncharecterized protein	-
Strongyloides_stercoralis_Contig203	eln_chickelastin precursor	-
Strongyloides_stercoralis_Contig211	fk506-binding protein family member (fkb-5)	EC:5.2.1.8,
Strongyloides_stercoralis_Contig224	brugia malayi	-
Strongyloides_stercoralis_Contig252	transthyretin-like family protein	-
Strongyloides_stercoralis_Contig313	Uncharecterized protein	-
Strongyloides_stercoralis_Contig315	hypothetical upf0205 proteinin chromosome iii	-
Strongyloides_stercoralis_Contig343	nematode astacin protease family member (nas-37)	EC:3.4.24.21,
Strongyloides_stercoralis_Contig350	gli pathogenesis-related 2
Strongyloides_stercoralis_Contig358	fmrfamide-related peptide flp-18 precursor
Strongyloides_stercoralis_Contig409	nematode cuticle collagen n-terminal domain containing protein
Strongyloides_stercoralis_Contig421	lipase family protein
Strongyloides_stercoralis_Contig422	hypothetical upf0205 proteinin chromosome iii	-
Strongyloides_stercoralis_Contig432	beta 6
Strongyloides_stercoralis_Contig475	Uncharecterized protein	-
Strongyloides_stercoralis_Contig512	fatty acid retinoid binding protein precursor
Strongyloides_stercoralis_Contig562	Uncharecterized protein	-
Strongyloides_stercoralis_Contig582	gli pathogenesis-related 2
Strongyloides_stercoralis_Contig631	lysozyme 1
Strongyloides_stercoralis_Contig665	Uncharecterized protein
Strongyloides_stercoralis_Contig753	Uncharecterized protein
Strongyloides_stercoralis_Contig820	Uncharecterized protein	-
Strongyloides_stercoralis_Contig824	Uncharecterized protein	-
Strongyloides_stercoralis_Contig826	sxp ral-2 protein	-
Strongyloides_stercoralis_Contig868	trehalase family protein
Strongyloides_stercoralis_Contig874	Uncharecterized protein	-
Strongyloides_stercoralis_Contig912	histone 1
Strongyloides_stercoralis_Contig928	Uncharecterized protein	-
Strongyloides_stercoralis_Contig1039	Uncharecterized protein	-
Strongyloides_stercoralis_Contig1058	ye1a_caeel uncharacterized protein
Strongyloides_stercoralis_Contig1064	chromosome 9 open reading frame 4	-
Strongyloides_stercoralis_Contig1120	ground-like domain containing protein	-
Strongyloides_stercoralis_Contig1186	lipase superfamily	-
Strongyloides_stercoralis_Contig1226	Uncharecterized protein	-
Strongyloides_stercoralis_Contig1238	Uncharecterized protein	-
Strongyloides_stercoralis_Contig1243	Uncharecterized protein	-
Strongyloides_stercoralis_Contig1344;	Uncharecterized protein	-
Strongyloides_stercoralis_Contig1393	cg31221-isoform a	-
Strongyloides_stercoralis_Contig1441	Uncharecterized protein	-
Strongyloides_stercoralis_Contig1498	peptidylprolyl isomerase b	EC:5.2.1.8,
gi|12714750|gb|BG227195.1|BG227195	hypothetical upf0205 proteinin chromosome iii	-
gi|12714188|gb|BG226633.1|BG226633	structural maintenance of chromosomes smc3
gi|12713964|gb|BG226409.1|BG226409	cathepsin f like protease
gi|10715386|gb|BF015111.1|BF015111	Uncharecterized protein	-
gi|9832790|gb|BE581848.1|BE581848	Uncharecterized protein	-
gi|9832499|gb|BE581557.1|BE581557	Uncharecterized protein	-
gi|9830833|gb|BE579891.1|BE579891	myotubularin related protein 3	EC:3.1.3.48,
gi|9830587|gb|BE579645.1|BE579645	Uncharecterized protein	-
gi|9829999|gb|BE579057.1|BE579057	Uncharecterized protein	-
gi|8929594|gb|BE224358.1|BE224358	Uncharecterized protein	-
gi|8929119|gb|BE223883.1|BE223883	scp-related protein	-
Wuchereria_bancrofti_Contig11	Uncharecterized protein	-
Wuchereria_bancrofti_Contig17	fk506-binding protein family member (fkb-5)	EC:5.2.1.8,
Wuchereria_bancrofti_Contig26	brugia malayi	-
Wuchereria_bancrofti_Contig79	mitochondrial ribosomal protein s14	EC:3.6.5.3,
Wuchereria_bancrofti_Contig84	domain containing protein
Wuchereria_bancrofti_Contig91	Uncharecterized protein	-
Wuchereria_bancrofti_Contig105	abundant larval transcript-2 protein	-
Wuchereria_bancrofti_Contig144	abundant larval transcript-2 protein	-
Wuchereria_bancrofti_Contig152	cathepsin l-like	EC:3.4.22.15,
Wuchereria_bancrofti_Contig170	vespid allergen antigen homolog
Wuchereria_bancrofti_Contig249	Uncharecterized protein	-
Wuchereria_bancrofti_Contig268	calreticulin
Wuchereria_bancrofti_Contig295	20s rrnahomolog
Wuchereria_bancrofti_Contig317	eukaryotic translation initiation factor
Wuchereria_bancrofti_Contig373	superoxide dismutase
Wuchereria_bancrofti_Contig377	dual specificitycatalytic domain containing protein	EC:3.1.3,
gi|45244002|gb|CK855379.1|CK855379	cystatin e m
gi|45243730|gb|CK855107.1|CK855107	Uncharecterized protein	-
gi|45243402|gb|CK854802.1|CK854802	surface-associated antigen 1	-
gi|45215207|gb|CK850732.1|CK850732	protein kinase domain containing protein	-
gi|45215167|gb|CK850711.1|CK850711	heavy neurofilament	-
gi|45214812|gb|CK850533.1|CK850533	db module family protein	-
gi|45214784|gb|CK850519.1|CK850519	ymv2_caeel uncharacterized proteinprecursor	-
gi|45214682|gb|CK850468.1|CK850468	v-myb myeloblastosis viral oncogene homologue	-
gi|45214607|gb|CK850426.1|CK850426	ns1 binding protein	-
gi|45214484|gb|CK850364.1|CK850364	chymotrypsin-like protein	EC:3.4.21,
gi|42579896|gb|CK726358.1|CK726358	transmembrane emp24 protein transport domain containing 7
gi|42579797|gb|CK726259.1|CK726259	galactose-specific c-type	-
gi|31370651|gb|CD455911.1|CD455911	Uncharecterized protein	-
gi|31370573|gb|CD455833.1|CD455833	hyaluronoglucosaminidase 1	-
gi|31370535|gb|CD455795.1|CD455795	2h2 type family protein	-
gi|31370406|gb|CD455666.1|CD455666	hypothetical upf0205 proteinin chromosome iii	-
gi|31370396|gb|CD455656.1|CD455656	2h2 type family protein	-
gi|31370312|gb|CD455572.1|CD455572	Uncharecterized protein	-
gi|31370125|gb|CD455385.1|CD455385	bone morphogenetic protein type 1	-
gi|31370007|gb|CD455267.1|CD455267	complement component 4 bindingbeta	-
gi|31369804|gb|CD455064.1|CD455064	Uncharecterized protein	-
gi|31230386|gb|CD374730.1|CD374730	serine threonine kinase 11	EC:2.7.11, EC:2.7.10,
gi|1621124|gb|AA080819.1|AA080819	Uncharecterized protein	-
Ancylostoma_caninum_Contig37;	peptidaseprolyl oligopeptidase active site region
Ancylostoma_caninum_Contig69	Uncharecterized protein	-
Ancylostoma_caninum_Contig153	mechanosensory abnormality family member (mec-2)
Ancylostoma_caninum_Contig167;	eukaryotic translation initiation factorsubunit 547kda
Ancylostoma_caninum_Contig214	atp8a1 protein
Ancylostoma_caninum_Contig223	defective proboscis extension	-
Ancylostoma_caninum_Contig246	Uncharecterized protein	-
Ancylostoma_caninum_Contig392	gamma-glutamyltranspeptidase family protein	-
Ancylostoma_caninum_Contig423	uncoordinated family member (unc-49)
Ancylostoma_caninum_Contig439;	Uncharecterized protein	-
Ancylostoma_caninum_Contig477	cysteine proteinase
Ancylostoma_caninum_Contig533;	methyltransferase 10 domain containing
Ancylostoma_caninum_Contig541	Uncharecterized protein	-
Ancylostoma_caninum_Contig646	Uncharecterized protein	-
Ancylostoma_caninum_Contig711	asparagine-linked glycosylation 1 homolog (beta--mannosyltransferase)
Ancylostoma_caninum_Contig734	Uncharecterized protein	-
Ancylostoma_caninum_Contig767;	abnormal cell lineage family member (lin-54)
Ancylostoma_caninum_Contig871	rna polymerase iii 80 kda subunit rpc5
Ancylostoma_caninum_Contig1050;	Uncharecterized protein	-
Ancylostoma_caninum_Contig1113	Uncharecterized protein	-
Ancylostoma_caninum_Contig1227	Uncharecterized protein	-
Ancylostoma_caninum_Contig1275;	eps15 (endocytosis protein) homologous sequence family member (ehs-1)
Ancylostoma_caninum_Contig1387	vacuolar protein sorting-associated protein	EC:3.1.3.48,
Ancylostoma_caninum_Contig1405	Uncharecterized protein	-
Ancylostoma_caninum_Contig1429	Uncharecterized protein	-
Ancylostoma_caninum_Contig1446	transcriptional regulator	-
Ancylostoma_caninum_Contig1540;	Uncharecterized protein	-
Ancylostoma_caninum_Contig1577	Uncharecterized protein	-
Ancylostoma_caninum_Contig1604;	cdc7 cell division cycle 7	-
Ancylostoma_caninum_Contig1638	dipeptidyl aminopeptidase	-
Ancylostoma_caninum_Contig1720;	Uncharecterized protein	-
Ancylostoma_caninum_Contig1722	iron transport multicopper oxidase fet3 precursor
Ancylostoma_caninum_Contig1757;	60s acidic ribosomal protein p0
Ancylostoma_caninum_Contig1910;	sphingosine kinase 1
Ancylostoma_caninum_Contig2018	24 kda excretory secretory protein	-
Ancylostoma_caninum_Contig2071;	Uncharecterized protein	-
Ancylostoma_caninum_Contig2177	Uncharecterized protein	-
Ancylostoma_caninum_Contig2289	venom-allergen-like protein family member (vap-1)	-
Ancylostoma_caninum_Contig2296	cofactor required for sp1 transcriptionalsubunit 3
Ancylostoma_caninum_Contig2301	glycoside hydrolases
Ancylostoma_caninum_Contig2402	conserved protein
Ancylostoma_caninum_Contig2474	Uncharecterized protein	-
Ancylostoma_caninum_Contig2674	beta 3-glycosyltransferase-like	-
Ancylostoma_caninum_Contig2683	Uncharecterized protein	-
Ancylostoma_caninum_Contig2722;	2-deoxyribose-5-phosphate aldolase homolog	EC:4.1.2.4,
Ancylostoma_caninum_Contig2781	Uncharecterized protein	-
Ancylostoma_caninum_Contig2789	retinol dehydrogenase 7	EC:1.1.1.105,
Ancylostoma_caninum_Contig2844	purple acid	-
Ancylostoma_caninum_Contig2869	acyl-synthetase long-chain family member 4	EC:6.2.1.26, EC:6.1.1.13, EC:6.2.1.1,
Ancylostoma_caninum_Contig2896	Uncharecterized protein	-
Ancylostoma_caninum_Contig3038	protein disulfide isomerase	-
Ancylostoma_caninum_Contig3055	Uncharecterized protein	-
Ancylostoma_caninum_Contig3108	Uncharecterized protein	-
Ancylostoma_caninum_Contig3152	f-box and wd-40 domain protein 11	EC:6.3.2.19,
Ancylostoma_caninum_Contig3221	lipopolysaccharide binding protein	-
Ancylostoma_caninum_Contig3245;	protein	-
Ancylostoma_caninum_Contig3264	Uncharecterized protein	-
Ancylostoma_caninum_Contig3273	Uncharecterized protein	-
Ancylostoma_caninum_Contig3275	Uncharecterized protein	-
Ancylostoma_caninum_Contig3286	Uncharecterized protein	-
Ancylostoma_caninum_Contig3296	atp-bindingsub-family c (cftr mrp)memberisoform cra_a
Ancylostoma_caninum_Contig3308	udp-ransferase family member (ugt-65)	-
Ancylostoma_caninum_Contig3320	Uncharecterized protein	-
Ancylostoma_caninum_Contig3336	Uncharecterized protein	-
Ancylostoma_caninum_Contig3460	member ras oncogene family
Ancylostoma_caninum_Contig3474	prion-like-(q n-rich)-domain-bearing protein family member (pqn-74)
Ancylostoma_caninum_Contig3516	alcohol dehydrogenasedomain protein
Ancylostoma_caninum_Contig3551;	kiaa2021 protein	-
Ancylostoma_caninum_Contig3649	mgc84153 protein	-
Ancylostoma_caninum_Contig3727	Uncharecterized protein	-
Ancylostoma_caninum_Contig3771	Uncharecterized protein	-
Ancylostoma_caninum_Contig3800	heterogeneous nuclear ribonucleoprotein f
Ancylostoma_caninum_Contig3878	u40417_5 transthyretin-related family domain protein 30	-
Ancylostoma_caninum_Contig3981;	Uncharecterized protein	-
Ancylostoma_caninum_Contig3991	Uncharecterized protein	-
Ancylostoma_caninum_Contig4017	Uncharecterized protein	-
Ancylostoma_caninum_Contig4067	Uncharecterized protein	-
Ancylostoma_caninum_Contig4076;	Uncharecterized protein	-
Ancylostoma_caninum_Contig4083	Uncharecterized protein	-
Ancylostoma_caninum_Contig4092;	tectonic family member 3	-
Ancylostoma_caninum_Contig4115	Uncharecterized protein	-
Ancylostoma_caninum_Contig4155	protein-tyrosine phosphatase containing protein	-
Ancylostoma_caninum_Contig4175;	oant response abnormal family member (odr-2)	-
Ancylostoma_caninum_Contig4269	myo-inositol transporter
Ancylostoma_caninum_Contig4283	huntingtin interacting protein e
Ancylostoma_caninum_Contig4327	trehalase family protein	EC:3.2.1.28,
Ancylostoma_caninum_Contig4393	protein disulfide isomerase	EC:5.3.4.1, EC:2.3.2.13,
Ancylostoma_caninum_Contig4523	neurotransmitter gated ion channel
Ancylostoma_caninum_Contig4575	est2_caeelesterase cm06b1
Ancylostoma_caninum_Contig4584	estrogen-related receptor beta like 1
Ancylostoma_caninum_Contig4608	Uncharecterized protein	-
Ancylostoma_caninum_Contig4686	venom-allergen-like protein family member (vap-1)	-
Ancylostoma_caninum_Contig4692	chloride channel protein 2
Ancylostoma_caninum_Contig4711;	calumenin
Ancylostoma_caninum_Contig4714	rna-binding protein prp-1	-
Ancylostoma_caninum_Contig4809	udp-glucuronate decarboxylase 1	EC:5.3.3.1, EC:1.1.1.133, EC:4.1.1.35, EC:4.2.1.47, EC:1.1.1.145, EC:5.1.3.2, EC:5.1.3.20, EC:4.2.1.46,
Ancylostoma_caninum_Contig4848;	dnase ii homolog
Ancylostoma_caninum_Contig4859	secreted protein asp-2	-
Ancylostoma_caninum_Contig4862;	nucleolar complex associated 4 homolog
Ancylostoma_caninum_Contig4900	Uncharecterized protein	-
Ancylostoma_caninum_Contig4904	membrane-associated protein gex-3
Ancylostoma_caninum_Contig4910	esterase d formylglutathione hydrolase	EC:3.1.1, EC:3.1.1.1,
Ancylostoma_caninum_Contig4968	secreted protein 3 precursor	-
Ancylostoma_caninum_Contig4987	cystatin 10
Ancylostoma_caninum_Contig5058;	Uncharecterized protein	-
Ancylostoma_caninum_Contig5129	brugia malayi	-
Ancylostoma_caninum_Contig5132	Uncharecterized protein	-
Ancylostoma_caninum_Contig5133	novel protein	-
Ancylostoma_caninum_Contig5164	upf0041 domain protein	-
Ancylostoma_caninum_Contig5187	uncoordinated family member (unc-9)	-
Ancylostoma_caninum_Contig5211	Uncharecterized protein	-
Ancylostoma_caninum_Contig5221	Uncharecterized protein	-
Ancylostoma_caninum_Contig5225	ubiquitin-conjugating enzyme e2g 2	EC:6.3.2.19,
Ancylostoma_caninum_Contig5255;	Uncharecterized protein	-
Ancylostoma_caninum_Contig5286	cysteine proteinase	EC:3.4.22,
Ancylostoma_caninum_Contig5331	ywq1_caeel uncharacterized protein	-
Ancylostoma_caninum_Contig5339;	pharyngeal gland toxin-related family member (phat-1)
Ancylostoma_caninum_Contig5345	af372651_1tissue metalloprotease inhibitor	-
Ancylostoma_caninum_Contig5357;	yl4m_caeel uncharacterized protein	-
Ancylostoma_caninum_Contig5385	metalloprotease 1 precursor
Ancylostoma_caninum_Contig5411;	cysteine proteinase
Ancylostoma_caninum_Contig5423;	Uncharecterized protein	-
Ancylostoma_caninum_Contig5471	Uncharecterized protein	-
Ancylostoma_caninum_Contig5519;	Uncharecterized protein	-
Ancylostoma_caninum_Contig5597	transthyretin-like protein 3 precursor	-
Ancylostoma_caninum_Contig5620;	ypd8_caeel uncharacterized protein	-
Ancylostoma_caninum_Contig5664	protein
Ancylostoma_caninum_Contig5689	precursor transthyretin like protein 1	-
Ancylostoma_caninum_Contig5769	transthyretin-like family protein	-
Ancylostoma_caninum_Contig5775	secreted protein 5 precursor	-
Ancylostoma_caninum_Contig5825	venom-allergen-like protein family member (vap-1)	-
Ancylostoma_caninum_Contig5863	Uncharecterized protein	-
Ancylostoma_caninum_Contig5912	Uncharecterized protein	-
Ancylostoma_caninum_Contig5923;	yfmo_caeel transthyretin-like proteinprecursor	-
Ancylostoma_caninum_Contig5937	Uncharecterized protein	-
Ancylostoma_caninum_Contig5965	Uncharecterized protein	-
Ancylostoma_caninum_Contig5996;	ubiquitin specific peptidaseisoform cra_a
Ancylostoma_caninum_Contig6019	Uncharecterized protein	-
Ancylostoma_caninum_Contig6044	subfamilymember 9
Ancylostoma_caninum_Contig6069;	tolloid-like protein
Ancylostoma_caninum_Contig6143;	nucleosome assembly protein 1-like 1
Ancylostoma_caninum_Contig6175	wd repeat domain 57 (u5 snrnp specific)
Ancylostoma_caninum_Contig6204;	Uncharecterized protein	-
Ancylostoma_caninum_Contig6242;	hyaluronoglucosaminidase 4
Ancylostoma_caninum_Contig6265;	Uncharecterized protein	-
Ancylostoma_caninum_Contig6322	Uncharecterized protein	-
Ancylostoma_caninum_Contig6346	superoxide dismutase	EC:1.15.1.1,
Ancylostoma_caninum_Contig6347;	isoform 1	-
Ancylostoma_caninum_Contig6414	collagen type xii alpha 1
Ancylostoma_caninum_Contig6421	secreted protein asp-2	-
Ancylostoma_caninum_Contig6452	Uncharecterized protein	-
Ancylostoma_caninum_Contig6462;	Uncharecterized protein	-
Ancylostoma_caninum_Contig6515	fmrf-like peptide family member (flp-8)
Ancylostoma_caninum_Contig6545;	Uncharecterized protein	-
Ancylostoma_caninum_Contig6635	secreted protein 4 precursor	-
Ancylostoma_caninum_Contig6653;	Uncharecterized protein	-
Ancylostoma_caninum_Contig6670	Uncharecterized protein	-
Ancylostoma_caninum_Contig6689	restriction modification enzyme	-
Ancylostoma_caninum_Contig6693	eukaryotic translation initiation factor 4e
Ancylostoma_caninum_Contig6707	member ras oncogene family	EC:3.6.5.1, EC:3.6.5.2, EC:3.6.5.3, EC:3.6.5.4,
Ancylostoma_caninum_Contig6736	ribosomal protein s12	EC:3.6.5.3,
Ancylostoma_caninum_Contig6781	Uncharecterized protein	-
Ancylostoma_caninum_Contig6784;	Uncharecterized protein	-
Ancylostoma_caninum_Contig6806;	Uncharecterized protein	-
Ancylostoma_caninum_Contig6860;	Uncharecterized protein	-
Ancylostoma_caninum_Contig6872	immunodominant hypodermal antigen ac16	-
Ancylostoma_caninum_Contig6899;	tripeptidyl peptidase ii	-
Ancylostoma_caninum_Contig6908	anticoagulant protein 7 precursor	-
Ancylostoma_caninum_Contig6919	fucosyltransferase 8
Ancylostoma_caninum_Contig6920	loc561562 protein
Ancylostoma_caninum_Contig6980	Uncharecterized protein	-
Ancylostoma_caninum_Contig7011	wap four-disulfide core domain protein 8 precursor (protease inhibitor wap8)
Ancylostoma_caninum_Contig7018	nematode cuticle collagen n-terminal domain containing protein
Ancylostoma_caninum_Contig7031	Uncharecterized protein	-
Ancylostoma_caninum_Contig7106	Uncharecterized protein	-
Ancylostoma_caninum_Contig7139	aspartyl protease inhibitor 1
Ancylostoma_caninum_Contig7189	cell division cycle and apoptosis regulator 1
Ancylostoma_caninum_Contig7200	secreted protein 5 precursor	-
Ancylostoma_caninum_Contig7215;	Uncharecterized protein	-
Ancylostoma_caninum_Contig7231	Uncharecterized protein	-
Ancylostoma_caninum_Contig7273	prolyl carboxy peptidase like family member (pcp-3)	-
Ancylostoma_caninum_Contig7308;	Uncharecterized protein	-
Ancylostoma_caninum_Contig7345	fumarate hydratase 1	EC:4.3.2.2, EC:4.3.2.1, EC:5.5.1.2, EC:4.2.1.2, EC:4.3.1.1,
Ancylostoma_caninum_Contig7354	enhancer of ksr-1 lethality family member (ekl-1)
Ancylostoma_caninum_Contig7378	chk1 checkpoint homolog
Ancylostoma_caninum_Contig7404	Uncharecterized protein	-
Ancylostoma_caninum_Contig7548;	secreted protein 5 precursor	-
Ancylostoma_caninum_Contig7584	Uncharecterized protein	-
Ancylostoma_caninum_Contig7640	cell wall adhesin	-
Ancylostoma_caninum_Contig7655	secreted protein asp-2	-
Ancylostoma_caninum_Contig7684;	atp-bindingsub-family dmember 4	EC:3.6.3.28,
Ancylostoma_caninum_Contig7711	Uncharecterized protein	-
Ancylostoma_caninum_Contig7725	Uncharecterized protein	-
Ancylostoma_caninum_Contig7777	glycosyl hydrolases family 25 protein
Ancylostoma_caninum_Contig7795;	Uncharecterized protein	-
Ancylostoma_caninum_Contig7820	Uncharecterized protein	-
Ancylostoma_caninum_Contig7846	Uncharecterized protein	-
Ancylostoma_caninum_Contig7859;	venom-allergen-like protein family member (vap-1)	-
Ancylostoma_caninum_Contig7866	ring finger protein 126	-
Ancylostoma_caninum_Contig7901	Uncharecterized protein	-
Ancylostoma_caninum_Contig7963	Uncharecterized protein	-
Ancylostoma_caninum_Contig8017	gli pathogenesis-related 1	-
Ancylostoma_caninum_Contig8088	cathepsin a	EC:3.4.16,
Ancylostoma_caninum_Contig8089;	Uncharecterized protein	-
Ancylostoma_caninum_Contig8094;	glutamine synthetase
Ancylostoma_caninum_Contig8109	hyphally-regulated cell wall protein	-
Ancylostoma_caninum_Contig8162	lysozyme family member (lys-8)
Ancylostoma_caninum_Contig8192	Uncharecterized protein	-
Ancylostoma_caninum_Contig8229	threonine dehydratase
Ancylostoma_caninum_Contig8335	butyrylcholinesterase
Ancylostoma_caninum_Contig8355	peptidylglycine alpha-hydroxylating monooxygenase	EC:1.14.17.3,
Ancylostoma_caninum_Contig8501	a proteinin chromosome	-
Ancylostoma_caninum_Contig8510	secreted protein 5 precursor	-
Ancylostoma_caninum_Contig8588;	cathepsin b
Ancylostoma_caninum_Contig8589	transthyretin-like family protein	-
Ancylostoma_caninum_Contig8629	variable membrane protein	-
Ancylostoma_caninum_Contig8633	secreted protein 5 precursor	-
Ancylostoma_caninum_Contig8670	zinc finger ccch-type domain containing 6
Ancylostoma_caninum_Contig8695	Uncharecterized protein	-
Ancylostoma_caninum_Contig8713	solute carrier family 27 (fatty acid transporter)member 4	EC:6.2.1,
Ancylostoma_caninum_Contig8829	Uncharecterized protein	-
Ancylostoma_caninum_Contig8888;	eb module family protein
Ancylostoma_caninum_Contig8893	Uncharecterized protein	-
Ancylostoma_caninum_Contig8967	Uncharecterized protein	-
Ancylostoma_caninum_Contig9004	Uncharecterized protein	-
Ancylostoma_caninum_Contig9030;	mgc84683 protein
Ancylostoma_caninum_Contig9039	Uncharecterized protein	-
Ancylostoma_caninum_Contig9067	Uncharecterized protein	-
Ancylostoma_caninum_Contig9073	Uncharecterized protein	-
Ancylostoma_caninum_Contig9090	secreted protein 5 precursor	-
Ancylostoma_caninum_Contig9137	inosine-uridine preferring nucleoside hydrolase	-
Ancylostoma_caninum_Contig9170	progestin and adipoq receptor family member v	-
Ancylostoma_caninum_Contig9282	-	-
Ancylostoma_caninum_Contig9284;	Uncharecterized protein	-
Ancylostoma_caninum_Contig9285	surface antigen protein	-
Ancylostoma_caninum_Contig9324	Uncharecterized protein	-
Ancylostoma_caninum_Contig9328;	cg31650-isoform c	-
Ancylostoma_caninum_Contig9342;	Uncharecterized protein	-
Ancylostoma_caninum_Contig9382;	Uncharecterized protein	-
Ancylostoma_caninum_Contig9395;	Uncharecterized protein	-
Ancylostoma_caninum_Contig9483;	Uncharecterized protein	-
Ancylostoma_caninum_Contig9500;	Uncharecterized protein	-
Ancylostoma_caninum_Contig9517	Uncharecterized protein	-
Ancylostoma_caninum_Contig9528	Uncharecterized protein
Ancylostoma_caninum_Contig9576;	Uncharecterized protein	-
Ancylostoma_caninum_Contig9586	Uncharecterized protein	-
Ancylostoma_caninum_Contig9608	fmrf-like peptide family member (flp-8)	-
Ancylostoma_caninum_Contig9639	novel proteinvertebrate low density lipoprotein 1b (deleted in tumors)
Ancylostoma_caninum_Contig9686;	Uncharecterized protein	-
Ancylostoma_caninum_Contig9741	secreted protein asp-2	-
Ancylostoma_caninum_Contig9742	secreted protein asp-2
Ancylostoma_caninum_Contig9753	cysteine proteinase
Ancylostoma_caninum_Contig9757	Uncharecterized protein	-
Ancylostoma_caninum_Contig9759	timp metallopeptidase inhibitor 2
Ancylostoma_caninum_Contig9762	lysozyme family member (lys-8)
Ancylostoma_caninum_Contig9764	secreted protein asp-2	-
Ancylostoma_caninum_Contig9771	asp_anccaancylostoma secreted protein precursor	-
Ancylostoma_caninum_Contig9773	Uncharecterized protein	-
Ancylostoma_caninum_Contig9777	c-type lectin family member (clec-48)	-
Ancylostoma_caninum_Contig9781	calcium activated nucleotidaseisoform cra_b	EC:3.6.1.6,
Ancylostoma_caninum_Contig9787	secreted protein asp-2	-
Ancylostoma_caninum_Contig9790	secreted protein asp-2	-
Ancylostoma_caninum_Contig9792	pharyngeal gland toxin-related family member (phat-1)
Ancylostoma_caninum_Contig9808	secreted protein 5 precursor	-
Ancylostoma_caninum_Contig9811	onchocerca related antigen family member (ora-1)	-
Ancylostoma_caninum_Contig9815	secreted protein asp-2	-
Ancylostoma_caninum_Contig9818	Uncharecterized protein	-
Ancylostoma_caninum_Contig9820	Uncharecterized protein	-
Ancylostoma_caninum_Contig9828	Uncharecterized protein	-
Ancylostoma_caninum_Contig9840	non-metastatic cellsproteinexpressed in	EC:2.7.4.6,
Ancylostoma_caninum_Contig9843	Uncharecterized protein	-
Ancylostoma_caninum_Contig9844	Uncharecterized protein	-
Ancylostoma_caninum_Contig9846;	anticoagulant protein c4	-
Ancylostoma_caninum_Contig9850;	tissue inhibitor of metalloproteinase 2
Ancylostoma_caninum_Contig9852	af388311_1c-type lectin ctl-2 precursor
Ancylostoma_caninum_Contig9861	Uncharecterized protein	-
Ancylostoma_caninum_Contig9875	glutathione peroxidase	EC:1.11.1.9,
Ancylostoma_caninum_Contig9890	Uncharecterized protein	-
Ancylostoma_caninum_Contig9892	Uncharecterized protein	-
Ancylostoma_caninum_Contig9928	Uncharecterized protein	-
Ancylostoma_caninum_Contig9930	ymp9_caeel uncharacterized proteinprecursor	-
Ancylostoma_caninum_Contig9936	orcokinin precursor
Ancylostoma_caninum_Contig9938	peptidylglycine alpha-amidating monooxygenase
Ancylostoma_caninum_Contig9941	Uncharecterized protein	-
Ancylostoma_caninum_Contig9943	Uncharecterized protein	-
Ancylostoma_caninum_Contig9959	cathepsin z	EC:3.4.22,
Ancylostoma_caninum_Contig9967	fmrf-like peptide family member (flp-1)
Ancylostoma_caninum_Contig9968	yaf1_caeel uncharacterized protein	-
Ancylostoma_caninum_Contig9984	Uncharecterized protein	-
Ancylostoma_caninum_Contig9998	Uncharecterized protein	-
Ancylostoma_caninum_Contig10000	temporarily assigned gene name family member (tag-293)	-
Ancylostoma_caninum_Contig10017	arginine-mutated in early stage tumors	-
Ancylostoma_caninum_Contig10035	non-metastatic cellsproteinexpressed in	EC:2.7.4.6,
Ancylostoma_caninum_Contig10055	myostatin
Ancylostoma_caninum_Contig10057	cg5276	EC:3.6.1.6,
Ancylostoma_caninum_Contig10061	Uncharecterized protein	-
Ancylostoma_caninum_Contig10073	Uncharecterized protein	-
Ancylostoma_caninum_Contig10084;	Uncharecterized protein	-
Ancylostoma_caninum_Contig10095	fmrf-like peptide family member (flp-24)	-
Ancylostoma_caninum_Contig10140	cysteine-rich venom	-
Ancylostoma_caninum_Contig10146	tissue inhibitor of metalloprotease	-
Ancylostoma_caninum_Contig10153	cysteine protease inhibitor family member (cpi-2)
Ancylostoma_caninum_Contig10161	Uncharecterized protein	-
Ancylostoma_caninum_Contig10174	Uncharecterized protein	-
Ancylostoma_caninum_Contig10208	Uncharecterized protein	-
Ancylostoma_caninum_Contig10246	two-domain activation associated secreted protein asp4 precursor	-
Ancylostoma_caninum_Contig10260	secreted protein asp-2	-
Ancylostoma_caninum_Contig10265	isoform cra_e	-
Ancylostoma_caninum_Contig10275	secreted protein asp-2	-
Ancylostoma_caninum_Contig10277	Uncharecterized protein	-
Ancylostoma_caninum_Contig10288	cathepsin b-like cysteine proteinase
Ancylostoma_caninum_Contig10301	Uncharecterized protein	-
Ancylostoma_caninum_Contig10308	Uncharecterized protein	-
Ancylostoma_caninum_Contig10322	Uncharecterized protein	-
Ancylostoma_caninum_Contig10338	fmrf-like peptide family member (flp-22)	-
Ancylostoma_caninum_Contig10340	Uncharecterized protein	-
Ancylostoma_caninum_Contig10347	Uncharecterized protein	-
Ancylostoma_caninum_Contig10355	fmrfamide-related peptide flp-12 precursor	-
Ancylostoma_caninum_Contig10361	hypothetical upf0205 proteinin chromosome iii	-
Ancylostoma_caninum_Contig10374	yfmo_caeel transthyretin-like proteinprecursor	-
Ancylostoma_caninum_Contig10379	hypothetical upf0205 proteinin chromosome iii	-
Ancylostoma_caninum_Contig10390	Uncharecterized protein	-
Ancylostoma_caninum_Contig10408;	Uncharecterized protein	-
Ancylostoma_caninum_Contig10411;	copper-zinc superoxide dismutase
Ancylostoma_caninum_Contig10419	Uncharecterized protein	-
Ancylostoma_caninum_Contig10427	hypothetical upf0205 proteinin chromosome iii
Ancylostoma_caninum_Contig10432	Uncharecterized protein	-
Ancylostoma_caninum_Contig10438	hypothetical upf0205 proteinin chromosome iii	-
Ancylostoma_caninum_Contig10457	neuropeptide-like protein family member (nlp-19)	-
Ancylostoma_caninum_Contig10488	Uncharecterized protein	-
Ancylostoma_caninum_Contig10501	Uncharecterized protein	-
Ancylostoma_caninum_Contig10526	precursor transthyretin like protein 1	-
Ancylostoma_caninum_Contig10537	neuropeptide-like protein family member (nlp-18)	-
Ancylostoma_caninum_Contig10539	osin-like protein family member (spp-16)	-
Ancylostoma_caninum_Contig10546	membrane-associated ring-ch protein	-
Ancylostoma_caninum_Contig10550	fmrfamide-related peptide precursor
Ancylostoma_caninum_Contig10588	Uncharecterized protein	-
Ancylostoma_caninum_Contig10630	Uncharecterized protein	-
Ancylostoma_caninum_Contig10668	Uncharecterized protein	-
Ancylostoma_caninum_Contig10672	osin-like protein family member (spp-10)	-
Ancylostoma_caninum_Contig10689;	Uncharecterized protein	-
Ancylostoma_caninum_Contig10695	yl13_caeel uncharacterized proteinprecursor	-
Ancylostoma_caninum_Contig10696;	Uncharecterized protein	-
Ancylostoma_caninum_Contig10711	yhb8_caeel uncharacterized proteinprecursor	-
Ancylostoma_caninum_Contig10713;	n-acetyltransferase 12	-
Ancylostoma_caninum_Contig10740	Uncharecterized protein	-
Ancylostoma_caninum_Contig10763	Uncharecterized protein	-
Ancylostoma_caninum_Contig10792	Uncharecterized protein	-
Ancylostoma_caninum_Contig10811;	selenoprotein t
gi|162414154|gb|FC555412.1|FC555412	Uncharecterized protein	-
gi|162411179|gb|FC552180.1|FC552180	Uncharecterized protein	-
gi|162411007|gb|FC552449.1|FC552449	Uncharecterized protein	-
gi|162409233|gb|FC550394.1|FC550394	Uncharecterized protein	-
gi|162407435|gb|FC549003.1|FC549003	organic cation transporter family member (oct-2)	-
gi|162407230|gb|FC548629.1|FC548629	Uncharecterized protein	-
gi|162405280|gb|FC546552.1|FC546552	Uncharecterized protein	-
gi|162403943|gb|FC545421.1|FC545421	mitochondrial translation initiation factor if-	EC:3.6.5.1, EC:3.6.5.2, EC:3.6.5.3, EC:3.6.5.4,
gi|162403605|gb|FC545379.1|FC545379	cg1333-isoform b
gi|162403201|gb|FC545084.1|FC545084	Uncharecterized protein	-
gi|162402050|gb|FC543822.1|FC543822	Uncharecterized protein	-
gi|162401629|gb|FC543353.1|FC543353	Uncharecterized protein	-
gi|162401504|gb|FC543245.1|FC543245	Uncharecterized protein	-
gi|162400631|gb|FC542386.1|FC542386	hepatic nuclear factor 4beta
gi|162399734|gb|FC541328.1|FC541328	Uncharecterized protein	-
gi|162399483|gb|FC541016.1|FC541016	Uncharecterized protein	-
gi|162398402|gb|FC540276.1|FC540276	progestin and adipoq receptor family member v	-
gi|161104508|gb|EY472790.1|EY472790	Uncharecterized protein	-
gi|161101991|gb|EY471132.1|EY471132	a proteinin chromosome	-
gi|161101916|gb|EY471684.1|EY471684	Uncharecterized protein	-
gi|161101904|gb|EY470562.1|EY470562	Uncharecterized protein	-
gi|161101428|gb|EY469709.1|EY469709	Uncharecterized protein	-
gi|161101178|gb|EY469759.1|EY469759	phospholipase b1	-
gi|161100726|gb|EY468876.1|EY468876	Uncharecterized protein	-
gi|161100696|gb|EY468869.1|EY468869	Uncharecterized protein	-
gi|161100006|gb|EY470049.1|EY470049	gaba-b receptor
gi|161098837|gb|EY465809.1|EY465809	beta-galactosyltransferase polypeptide 1	-
gi|161098761|gb|EY466218.1|EY466218	recepotor type guanyly cyclase	EC:2.7.11, EC:2.7.10,
gi|161098281|gb|EY465157.1|EY465157	cytochrome p450	-
gi|161098184|gb|EY466151.1|EY466151	Uncharecterized protein	-
gi|161098058|gb|EY465628.1|EY465628	aetopiperazine-based renin inhibitors: optimization of the "c" ring	EC:3.4.23.15,
gi|161097934|gb|EY467722.1|EY467722	gnat family family	-
gi|161097878|gb|EY466617.1|EY466617	Uncharecterized protein	-
gi|161097368|gb|EY465528.1|EY465528	Uncharecterized protein	-
gi|161095804|gb|EY464388.1|EY464388	Uncharecterized protein	-
gi|161095682|gb|EY464963.1|EY464963	syntaxin 1a
gi|161093843|gb|EY462868.1|EY462868	loc445834 protein	-
gi|161093335|gb|EY461228.1|EY461228	Uncharecterized protein	-
gi|161093275|gb|EY461168.1|EY461168	Uncharecterized protein	-
gi|161093212|gb|EY461978.1|EY461978	corneal epithelial rho-associated-ser thr kinase rock-i	EC:2.7.10,
gi|161093024|gb|EY461457.1|EY461457	glycosyl phosphatidylinositolsynthesis	-
gi|161092835|gb|EY460997.1|EY460997	Uncharecterized protein	-
gi|161092206|gb|EY460629.1|EY460629	4-coumarate-ligase-like protein	EC:6.2.1,
gi|161091495|gb|EY459528.1|EY459528	para-nitrobenzyl esterase (intracellular esterase b)	-
gi|161090708|gb|EY459138.1|EY459138	Uncharecterized protein	-
gi|161090463|gb|EY458959.1|EY458959	deoxyribonuclease ii beta
gi|161090047|gb|EY458543.1|EY458543	neuronal igcam family member (rig-3)	-
gi|161089932|gb|EY458490.1|EY458490	Uncharecterized protein	-
gi|161089857|gb|EY458401.1|EY458401	-	-
gi|161089781|gb|EY458325.1|EY458325	-	-
gi|158831517|gb|EX828003.1|EX828003	-	-
gi|158831341|gb|EX827827.1|EX827827	hyaluronoglucosaminidase 1
gi|158020520|gb|EX567138.1|EX567138	Uncharecterized protein	-
gi|158020139|gb|EX566757.1|EX566757	Uncharecterized protein	-
gi|158019722|gb|EX566340.1|EX566340	secreted protein 4 precursor	-
gi|158019385|gb|EX566003.1|EX566003	Uncharecterized protein	-
gi|158018225|gb|EX564843.1|EX564843	Uncharecterized protein	-
gi|158018040|gb|EX564658.1|EX564658	transmembrane protein 189
gi|158017899|gb|EX564517.1|EX564517	asparagine-linked glycosylation 8 homolog (alpha--glucosyltransferase)
gi|158017880|gb|EX564498.1|EX564498	Uncharecterized protein	-
gi|158016585|gb|EX563203.1|EX563203	Uncharecterized protein	-
gi|158016261|gb|EX562879.1|EX562879	Uncharecterized protein	-
gi|158016096|gb|EX562714.1|EX562714	Uncharecterized protein	-
gi|158015122|gb|EX561740.1|EX561740	Uncharecterized protein	-
gi|158014667|gb|EX561285.1|EX561285	Uncharecterized protein	-
gi|158012405|gb|EX559023.1|EX559023	neuropeptide-like protein family member (nlp-8)	-
gi|158012194|gb|EX558812.1|EX558812	chondroitinlycan family member (cpg-4)	-
gi|158010451|gb|EX557069.1|EX557069	glycosyl hydrolases family 25 protein
gi|158009937|gb|EX556555.1|EX556555	Uncharecterized protein	-
gi|158007345|gb|EX553963.1|EX553963	Uncharecterized protein	-
gi|158006978|gb|EX553596.1|EX553596	eb module family protein
gi|158006253|gb|EX552871.1|EX552871	Uncharecterized protein	-
gi|158004642|gb|EX551260.1|EX551260	hyaluronoglucosaminidase 3
gi|158004497|gb|EX551115.1|EX551115	Uncharecterized protein	-
gi|158003788|gb|EX550406.1|EX550406	Uncharecterized protein	-
gi|158003488|gb|EX550106.1|EX550106	Uncharecterized protein	-
gi|158002876|gb|EX549494.1|EX549494	Uncharecterized protein	-
gi|158002874|gb|EX549492.1|EX549492	Uncharecterized protein	-
gi|158002258|gb|EX548876.1|EX548876	Uncharecterized protein	-
gi|158000904|gb|EX547522.1|EX547522	Uncharecterized protein	-
gi|157999628|gb|EX546246.1|EX546246	Uncharecterized protein	-
gi|157998481|gb|EX545099.1|EX545099	protein	-
gi|157995764|gb|EX542382.1|EX542382	Uncharecterized protein	-
gi|157995400|gb|EX542018.1|EX542018	Uncharecterized protein	-
gi|157995320|gb|EX541938.1|EX541938	venom-allergen-like protein family member (vap-1)	-
gi|157994978|gb|EX541596.1|EX541596	Uncharecterized protein	-
gi|157994931|gb|EX541549.1|EX541549	Uncharecterized protein	-
gi|157994766|gb|EX541386.1|EX541386	focal adhesion kinase	EC:2.7.10,
gi|157994558|gb|EX541178.1|EX541178	Uncharecterized protein	-
gi|157994547|gb|EX541167.1|EX541167	classmember 1	-
gi|157994189|gb|EX540809.1|EX540809	Uncharecterized protein	-
gi|157994055|gb|EX540675.1|EX540675	Uncharecterized protein	-
gi|157993346|gb|EX539966.1|EX539966	riken cdnaisoform cra_b	-
gi|157992890|gb|EX539510.1|EX539510	cysteine proteinase	EC:3.4.22,
gi|157992133|gb|EX538753.1|EX538753	Uncharecterized protein	-
gi|157991883|gb|EX538503.1|EX538503	Uncharecterized protein	-
gi|157990993|gb|EX537612.1|EX537612	af368912_1immune reactiveprotease inhibitornh6
gi|157990875|gb|EX537494.1|EX537494	reverse transcriptase	-
gi|157990863|gb|EX537482.1|EX537482	Uncharecterized protein	-
gi|157990644|gb|EX537263.1|EX537263	Uncharecterized protein
gi|157990594|gb|EX537213.1|EX537213	subfamilymember 11
gi|157990577|gb|EX537196.1|EX537196	epithelial fusion failure family member (eff-1)
gi|157990539|gb|EX537158.1|EX537158	Uncharecterized protein	-
gi|157990360|gb|EX536979.1|EX536979	Uncharecterized protein	-
gi|157990098|gb|EX536717.1|EX536717	Uncharecterized protein	-
gi|157989429|gb|EX536048.1|EX536048	-	-
gi|157989158|gb|EX535777.1|EX535777	Uncharecterized protein	-
gi|156185468|gb|EW744260.1|EW744260	Uncharecterized protein	-
gi|156184690|gb|EW743482.1|EW743482	Uncharecterized protein	-
gi|156184520|gb|EW743312.1|EW743312	Uncharecterized protein	-
gi|156184346|gb|EW743138.1|EW743138	Uncharecterized protein	-
gi|156184276|gb|EW743068.1|EW743068	Uncharecterized protein	-
gi|156183430|gb|EW742222.1|EW742222	Uncharecterized protein	-
gi|156183098|gb|EW741890.1|EW741890	chromosome 20 open reading frame 116	-
gi|155969375|gb|ES672602.1|ES672602	Uncharecterized protein	-
gi|155969326|gb|ES672553.1|ES672553	secreted protein asp-2	-
gi|155969062|gb|ES672289.1|ES672289	Uncharecterized protein	-
gi|155969011|gb|ES672238.1|ES672238	Uncharecterized protein	-
gi|155968678|gb|ES671905.1|ES671905	Uncharecterized protein	-
gi|85673080|gb|DW718437.1|DW718437	annexin a4
gi|85673023|gb|DW718380.1|DW718380	Uncharecterized protein	-
gi|85672907|gb|DW718264.1|DW718264	Uncharecterized protein	-
gi|85672873|gb|DW718230.1|DW718230	Uncharecterized protein	-
gi|85672848|gb|DW718205.1|DW718205	Uncharecterized protein	-
gi|21809238|gb|BQ667556.1|BQ667556	major allergen	-
gi|21809234|gb|BQ667552.1|BQ667552	Uncharecterized protein	-
gi|21808988|gb|BQ667306.1|BQ667306	24-dehydrocholesterol reductase	EC:1.3.1,
gi|21808286|gb|BQ666604.1|BQ666604	Uncharecterized protein	-
gi|21808181|gb|BQ666499.1|BQ666499	Uncharecterized protein	-
gi|20199092|gb|BQ125181.1|BQ125181	protein disulfide isomerase	EC:5.3.4.1, EC:1.14.11.2, EC:2.3.2.13,
gi|17124905|gb|BM130353.1|BM130353	Uncharecterized protein	-
gi|17124840|gb|BM130288.1|BM130288	Uncharecterized protein	-
gi|17124668|gb|BM130116.1|BM130116	stan-like receptor (agap004850-pa)
gi|16924793|gb|BM077757.1|BM077757	Uncharecterized protein	-
gi|16924742|gb|BM077706.1|BM077706	Uncharecterized protein	-
gi|16924630|gb|BM077594.1|BM077594	Uncharecterized protein	-
gi|16924538|gb|BM077502.1|BM077502	Uncharecterized protein	-
gi|16924517|gb|BM077481.1|BM077481	Uncharecterized protein	-
gi|16924492|gb|BM077456.1|BM077456	Uncharecterized protein	-
gi|16924424|gb|BM077388.1|BM077388	neuropeptide-like protein family member (nlp-3)	-
gi|15774282|gb|BI773305.1|BI773305	membrane-bound lytic murein transglycosylase b
gi|15766064|gb|BI744262.1|BI744262	c-terminus-of-aex-binding protein family member (cab-1)	-
gi|12727491|gb|BG232320.1|BG232320	fmrf-like peptide family member (flp-13)
gi|11180773|gb|BF250590.1|BF250590	Uncharecterized protein	-
gi|11179791|gb|BF249578.1|BF249578	neuropeptide-like protein family member (nlp-5)	-
gi|11179734|gb|BF249618.1|BF249618	neuropeptide-like protein family member (nlp-1)	-
gi|9264331|gb|BE352478.1|BE352478	fmrf-like peptide family member (flp-5)	-
gi|9264280|gb|BE352427.1|BE352427	neuropeptide-like protein family member (nlp-38)	-
gi|8004584|gb|AW870531.1|AW870531	Uncharecterized protein	-
gi|8004394|gb|AW870303.1|AW870303	loc443603 protein	-
gi|7640981|gb|AW735272.1|AW735272	Uncharecterized protein	-
gi|7640883|gb|AW735176.1|AW735176	mucin 5	-
gi|7585050|gb|AW700929.1|AW700929	Uncharecterized protein	-
gi|7584780|gb|AW700665.1|AW700665	Uncharecterized protein	-
gi|7584665|gb|AW700552.1|AW700552	Uncharecterized protein	-
gi|7584311|gb|AW700206.1|AW700206	Uncharecterized protein	-
gi|7364136|gb|AW627232.1|AW627232	glycoprotein hormone beta 5	-
gi|7364073|gb|AW627169.1|AW627169	Uncharecterized protein	-
gi|7275466|gb|AW588434.1|AW588434	Uncharecterized protein	-
gi|6450241|gb|AW181781.1|AW181781	Uncharecterized protein	-
gi|6449988|gb|AW181528.1|AW181528	Uncharecterized protein	-
Ascaris_suum_Contig68	Uncharecterized protein	-
Ascaris_suum_Contig73	Uncharecterized protein	-
Ascaris_suum_Contig74	notch homolog scalloped wings	-
Ascaris_suum_Contig76	pharyngeal gland toxin-related family member (phat-2)	-
Ascaris_suum_Contig78	Uncharecterized protein	-
Ascaris_suum_Contig79	abundant larval transcript-2 protein	-
Ascaris_suum_Contig83;	Uncharecterized protein	-
Ascaris_suum_Contig94	Uncharecterized protein	-
Ascaris_suum_Contig97	Uncharecterized protein	-
Ascaris_suum_Contig165;	kinesin family member 23	EC:3.6.4.4,
Ascaris_suum_Contig194	actin related protein 2 3subunit41kda
Ascaris_suum_Contig221	nol5 protein
Ascaris_suum_Contig225	Uncharecterized protein	-
Ascaris_suum_Contig233;	Uncharecterized protein	-
Ascaris_suum_Contig236	#NAME?
Ascaris_suum_Contig310	Uncharecterized protein	-
Ascaris_suum_Contig326	aspartyl protease inhibitor 1	-
Ascaris_suum_Contig341	Uncharecterized protein	-
Ascaris_suum_Contig344	Uncharecterized protein	-
Ascaris_suum_Contig353	Uncharecterized protein	-
Ascaris_suum_Contig382	Uncharecterized protein	-
Ascaris_suum_Contig387	peptidylglycine alpha-amidating monooxygenase
Ascaris_suum_Contig399;	Uncharecterized protein	-
Ascaris_suum_Contig421	Uncharecterized protein	-
Ascaris_suum_Contig475	caseinolytic peptidase x
Ascaris_suum_Contig494	abundant larval transcript-2 protein	-
Ascaris_suum_Contig505	Uncharecterized protein	-
Ascaris_suum_Contig535	fmrfamide precursor
Ascaris_suum_Contig623	palmitoyl-protein thioesterase 1	EC:3.1.2.22,
Ascaris_suum_Contig636	acyl-coenzyme a binding protein family member (acbp-7)	-
Ascaris_suum_Contig665	fatty acid-binding protein homolog
Ascaris_suum_Contig673	Uncharecterized protein	-
Ascaris_suum_Contig736	Uncharecterized protein	-
Ascaris_suum_Contig757	af159590_1hypothetical esophageal gland cell secretory protein 11	-
Ascaris_suum_Contig760	egf-like domain-containing protein	-
Ascaris_suum_Contig768	Uncharecterized protein	-
Ascaris_suum_Contig804;	immunosuppressive ovarian message protein	-
Ascaris_suum_Contig815	scca2 scca1 fusion protein	-
Ascaris_suum_Contig850	arginine-mutated in early stage tumors	-
Ascaris_suum_Contig854	peptidylprolyl isomerase b (cyclophilin b)	EC:5.2.1.8,
Ascaris_suum_Contig919	tissue inhibitor of metalloproteinase 2
Ascaris_suum_Contig1027	Uncharecterized protein	-
Ascaris_suum_Contig1093	basic chitinase 1-1	EC:3.2.1.14,
Ascaris_suum_Contig1106	ubiquitin conjugating enzyme isoform 1	EC:6.3.2.19,
Ascaris_suum_Contig1115	short chain family member (dhs-14)	EC:1.1.1,
Ascaris_suum_Contig1116	c-type lectin family member (clec-62)	-
Ascaris_suum_Contig1134	purple acid	-
Ascaris_suum_Contig1137	cecropin p4	-
Ascaris_suum_Contig1148	Uncharecterized protein	-
Ascaris_suum_Contig1151	vitrin	-
Ascaris_suum_Contig1153	Uncharecterized protein	-
Ascaris_suum_Contig1157	Uncharecterized protein	-
Ascaris_suum_Contig1158	c-type lectin family member (clec-62)	-
Ascaris_suum_Contig1160	Uncharecterized protein	-
Ascaris_suum_Contig1164	neuropeptide-like protein family member (nlp-40)
Ascaris_suum_Contig1189	lysozyme 1
Ascaris_suum_Contig1190	matrilinisoform cra_b	-
Ascaris_suum_Contig1196	typealpha 3	-
Ascaris_suum_Contig1204	matrilinisoform cra_b	-
Ascaris_suum_Contig1247	Uncharecterized protein	-
Ascaris_suum_Contig1249	vitrin isoform 2	-
Ascaris_suum_Contig1251	vitrin isoform 2	-
Ascaris_suum_Contig1254	Uncharecterized protein	-
Ascaris_suum_Contig1276	Uncharecterized protein	-
Ascaris_suum_Contig1281	serine protease inhibitor 1
Ascaris_suum_Contig1299	protein kinase domain containing protein	-
Ascaris_suum_Contig1322	fatty acid retinoid binding protein precursor
Ascaris_suum_Contig1325	sperm activation without mating family member (swm-1)	-
Ascaris_suum_Contig1338	Uncharecterized protein	-
Ascaris_suum_Contig1345	chondroitinlycan family member (cpg-3)	-
Ascaris_suum_Contig1356	Uncharecterized protein	-
Ascaris_suum_Contig1374	Uncharecterized protein	-
Ascaris_suum_Contig1378	Uncharecterized protein	-
Ascaris_suum_Contig1383	c-type lectin family member (clec-62)	-
Ascaris_suum_Contig1395	Uncharecterized protein	-
Ascaris_suum_Contig1400	cathepsin l	EC:3.4.22.15,
Ascaris_suum_Contig1427	Uncharecterized protein	-
Ascaris_suum_Contig1438	sxp ral-2 family protein	-
Ascaris_suum_Contig1450	Uncharecterized protein	-
Ascaris_suum_Contig1480	Uncharecterized protein	-
Ascaris_suum_Contig1485	chitin binding peritrophin-a domain containing protein	-
Ascaris_suum_Contig1487	large subunit ribosomal protein 14	EC:3.6.5.3,
Ascaris_suum_Contig1501	Uncharecterized protein	-
Ascaris_suum_Contig1517	small subunit ribosomal protein 8
Ascaris_suum_Contig1527	uncoordinated family member (unc-44)	EC:3.2.1,
Ascaris_suum_Contig1531	Uncharecterized protein	-
Ascaris_suum_Contig1537;	c-type lectin precursor	-
Ascaris_suum_Contig1538;	Uncharecterized protein	-
Ascaris_suum_Contig1541	transthyretin-like protein 2 precursor	-
Ascaris_suum_Contig1542	Uncharecterized protein	-
Ascaris_suum_Contig1543	beta-tubulin isotype 1	EC:3.6.5.1, EC:3.6.5.2, EC:3.6.5.3, EC:3.6.5.4,
Ascaris_suum_Contig1548	Uncharecterized protein	-
Ascaris_suum_Contig1549;	Uncharecterized protein	-
Ascaris_suum_Contig1551	regenerating islet-derivedmember 4
Ascaris_suum_Contig1554	Uncharecterized protein	-
Ascaris_suum_Contig1555	Uncharecterized protein	-
Ascaris_suum_Contig1556	Uncharecterized protein	-
Ascaris_suum_Contig1557	Uncharecterized protein	-
Ascaris_suum_Contig1558	Uncharecterized protein	-
Ascaris_suum_Contig1560	Uncharecterized protein	-
Ascaris_suum_Contig1563	Uncharecterized protein	-
Ascaris_suum_Contig1574	mannosec type 2
Ascaris_suum_Contig1575	hypothetical upf0205 proteinin chromosome iii	-
Ascaris_suum_Contig1662	Uncharecterized protein	-
Ascaris_suum_Contig1668	proteasome 26s non-atpase subunit 1
Ascaris_suum_Contig1683	Uncharecterized protein	-
Ascaris_suum_Contig1686	Uncharecterized protein	-
Ascaris_suum_Contig1689	Uncharecterized protein	-
Ascaris_suum_Contig1698	hypothetical upf0205 proteinin chromosome iii	-
Ascaris_suum_Contig1722	Uncharecterized protein	-
Ascaris_suum_Contig1735	heat shock protein gp96
Ascaris_suum_Contig1737	g elongationmitochondrial 1	EC:3.6.5.1, EC:3.6.5.2, EC:3.6.5.3, EC:3.6.5.4,
Ascaris_suum_Contig1741	Uncharecterized protein	-
Ascaris_suum_Contig1748	Uncharecterized protein	-
Ascaris_suum_Contig1776	Uncharecterized protein	-
Ascaris_suum_Contig1780	Uncharecterized protein	-
Ascaris_suum_Contig1794	saposin-like typeregion 1 family protein	-
Ascaris_suum_Contig1813	immunoglobulin i-set domain containing protein	-
Ascaris_suum_Contig1815	Uncharecterized protein	-
Ascaris_suum_Contig1829	Uncharecterized protein	-
Ascaris_suum_Contig1830	Uncharecterized protein	-
Ascaris_suum_Contig1863;	Uncharecterized protein	-
Ascaris_suum_Contig1897	Uncharecterized protein	-
Ascaris_suum_Contig1901	Uncharecterized protein	-
Ascaris_suum_Contig1907	Uncharecterized protein	-
Ascaris_suum_Contig1912	calumenin precursor isoform 2
Ascaris_suum_Contig1952	Uncharecterized protein	-
Ascaris_suum_Contig1960	glutamate dehydrogenase	EC:1.4.1.3,
Ascaris_suum_Contig1996	ground-like domain containing protein	-
Ascaris_suum_Contig2000	transthyretin-like family protein	-
Ascaris_suum_Contig2020	maltase-glucoamylase (alpha-glucosidase)isoform cra_a
Ascaris_suum_Contig2026	Uncharecterized protein	-
Ascaris_suum_Contig2109	fmrfamide-related peptide flp-18 precursor
Ascaris_suum_Contig2111	Uncharecterized protein	-
Ascaris_suum_Contig2118	Uncharecterized protein	-
Ascaris_suum_Contig2180	protein disulfide isomerase	EC:5.3.4.1, EC:2.3.2.13,
Ascaris_suum_Contig2185	Uncharecterized protein	-
Ascaris_suum_Contig2197	24 kda secreted protein	-
Ascaris_suum_Contig2209	hypothetical upf0205 proteinin chromosome iii	-
Ascaris_suum_Contig2225	transthyretin-like family protein	-
Ascaris_suum_Contig2232	hypothetical upf0205 proteinin chromosome iii	-
Ascaris_suum_Contig2233	24 kda protein of as22	-
Ascaris_suum_Contig2242	Uncharecterized protein	-
Ascaris_suum_Contig2243	osin-like protein family member (spp-10)	-
Ascaris_suum_Contig2245	transthyretin-related family domain protein 47	-
Ascaris_suum_Contig2248	-	-
Ascaris_suum_Contig2263	phosphatidylethanolamine-binding protein	-
Ascaris_suum_Contig2265	aigh-resolution structure of ascaris trypsin inhibitor in solution: direct evidence for a ph induced conformational transition in the reactive site
Ascaris_suum_Contig2322	Uncharecterized protein	-
Ascaris_suum_Contig2391	Uncharecterized protein	-
Ascaris_suum_Contig2401	glyceraldehyde-3-phosphate dehydrogenase	EC:1.2.1.12, EC:1.2.1.11,
Ascaris_suum_Contig2423	protein kinase domain containing protein
Ascaris_suum_Contig2432	Uncharecterized protein	-
Ascaris_suum_Contig2433	Uncharecterized protein	-
Ascaris_suum_Contig2434	Uncharecterized protein	-
Ascaris_suum_Contig2437	Uncharecterized protein	-
Ascaris_suum_Contig2444	Uncharecterized protein	-
Ascaris_suum_Contig2446	Uncharecterized protein	-
Ascaris_suum_Contig2450	Uncharecterized protein	-
Ascaris_suum_Contig2470	Uncharecterized protein	-
Ascaris_suum_Contig2486	Uncharecterized protein	-
Ascaris_suum_Contig2488	Uncharecterized protein	-
Ascaris_suum_Contig2499	immunosuppressive ovarian message protein	-
Ascaris_suum_Contig2518	timp metallopeptidase inhibitor 2
Ascaris_suum_Contig2527	grn protein	-
Ascaris_suum_Contig2528	-	-
Ascaris_suum_Contig2536	Uncharecterized protein	-
Ascaris_suum_Contig2562	Uncharecterized protein	-
Ascaris_suum_Contig2565	Uncharecterized protein	-
Ascaris_suum_Contig2567	cathepsin b-like cysteine proteinase	EC:3.4.22,
Ascaris_suum_Contig2582	transthyretin-like family protein	-
Ascaris_suum_Contig2590	domain containing protein	-
Ascaris_suum_Contig2594	immunodominant hypodermal antigen ac16	-
Ascaris_suum_Contig2619	aspartyl protease inhibitor 1	-
Ascaris_suum_Contig2624;	Uncharecterized protein	-
Ascaris_suum_Contig2628	fructose-bisphosphate aldolase	EC:4.1.2.13,
Ascaris_suum_Contig2633	Uncharecterized protein	-
Ascaris_suum_Contig2636	Uncharecterized protein	-
Ascaris_suum_Contig2645	ribosomal protein s2	EC:3.6.5.3,
Ascaris_suum_Contig2663	vitrin	-
Ascaris_suum_Contig2671	fc fragment oflow affinityreceptor forisoform cra_b
Ascaris_suum_Contig2682	phosphatidylinositol transferalpha
Ascaris_suum_Contig2686	epicuticlin	-
Ascaris_suum_Contig2720	Uncharecterized protein	-
Ascaris_suum_Contig2721	Uncharecterized protein	-
Ascaris_suum_Contig2730	ecm 18
Ascaris_suum_Contig2732	af167710_1excretory secretory mucin muc-5	-
Ascaris_suum_Contig2733	Uncharecterized protein	-
Ascaris_suum_Contig2736	Uncharecterized protein	-
Ascaris_suum_Contig2749	cuticlin 1	-
Ascaris_suum_Contig2754	Uncharecterized protein	-
Ascaris_suum_Contig2777;	Uncharecterized protein	-
Ascaris_suum_Contig2785	novel protein
Ascaris_suum_Contig2805	Uncharecterized protein	-
Ascaris_suum_Contig2925;	hypothetical upf0205 proteinin chromosome iii	-
Ascaris_suum_Contig2929;	o-family 3
gi|121410372|gb|EB763507.1|EB763507	Uncharecterized protein	-
gi|121410364|gb|EB763489.1|EB763489	leucine rich repeat and fibronectin type iii domain containing 3
gi|91104703|gb|EB186746.1|EB186746	Uncharecterized protein	-
gi|76251228|gb|DV019392.1|DV019392	Uncharecterized protein	-
gi|27927165|gb|CB101358.1|CB101358	Uncharecterized protein	-
gi|27926278|gb|CB100471.1|CB100471	tau tubulin kinase 1
gi|27759736|gb|CB040492.1|CB040492	pancreatic protein with two somatomedin b domains	-
gi|27759496|gb|CB040252.1|CB040252	Uncharecterized protein	-
gi|27759109|gb|CB039865.1|CB039865	Uncharecterized protein	-
gi|27589135|gb|CB014399.1|CB014399	ts translation elongationmitochondrial	EC:3.6.5.3,
gi|27588932|gb|CB014196.1|CB014196	Uncharecterized protein	-
gi|27588541|gb|CB013805.1|CB013805	Uncharecterized protein	-
gi|27471389|gb|CA955029.1|CA955029	Uncharecterized protein	-
gi|27002075|gb|CA849754.1|CA849754	Uncharecterized protein	-
gi|24467847|gb|CA304788.1|CA304788	timp metallopeptidase inhibitor 2
gi|24467636|gb|CA304577.1|CA304577	Uncharecterized protein	-
gi|24467574|gb|CA304515.1|CA304515	pa2l_caeel phospholipase a2-like proteinprecursor	-
gi|24467546|gb|CA304487.1|CA304487	Uncharecterized protein	-
gi|24467290|gb|CA304231.1|CA304231	epoxide hydrolasemicrosomal	EC:3.4.11, EC:3.3.2.3,
gi|24466818|gb|CA303759.1|CA303759	immunosuppressive ovarian message protein	-
gi|24466464|gb|CA303405.1|CA303405	serpin peptidaseclade bmember 6
gi|24209332|gb|BU966326.1|BU966326	Uncharecterized protein	-
gi|23262141|gb|BU605971.1|BU605971	nuclear receptor nhr-64
gi|22139901|gb|BQ835587.1|BQ835587	Uncharecterized protein	-
gi|22139842|gb|BQ835528.1|BQ835528	ribosomal protein s9	EC:3.6.5.3,
gi|22139688|gb|BQ835374.1|BQ835374	Uncharecterized protein	-
gi|21058810|gb|BQ383296.1|BQ383296	ribosomal protein s15a	EC:3.6.5.3,
gi|21058777|gb|BQ383263.1|BQ383263	sxp ral-2 protein
gi|21058507|gb|BQ382993.1|BQ382993	Uncharecterized protein	-
gi|21058301|gb|BQ382787.1|BQ382787	collagen type xii alpha 1
gi|21058023|gb|BQ382509.1|BQ382509	Uncharecterized protein	-
gi|21057709|gb|BQ382195.1|BQ382195	matrilinisoform cra_b	-
gi|21057693|gb|BQ382179.1|BQ382179	matrilinisoform cra_b	-
gi|21057683|gb|BQ382169.1|BQ382169	cg10175-isoform c	-
gi|21057670|gb|BQ382156.1|BQ382156	Uncharecterized protein	-
gi|21057577|gb|BQ382063.1|BQ382063	Uncharecterized protein	-
gi|21057501|gb|BQ381987.1|BQ381987	Uncharecterized protein	-
gi|21057441|gb|BQ381927.1|BQ381927	matrilinisoform cra_b	-
gi|21056790|gb|BQ381276.1|BQ381276	matrilinisoform cra_b	-
gi|21056322|gb|BQ380808.1|BQ380808	Uncharecterized protein	-
gi|21056282|gb|BQ380768.1|BQ380768	Uncharecterized protein	-
gi|21056222|gb|BQ380708.1|BQ380708	egf-like domain-containing protein	-
gi|20077492|gb|BQ096275.1|BQ096275	sxp ral-2 family protein	-
gi|20077326|gb|BQ096109.1|BQ096109	chondroitinlycan family member (cpg-3)	-
gi|20077214|gb|BQ095997.1|BQ095997	Uncharecterized protein	-
gi|20077153|gb|BQ095936.1|BQ095936	sxp ral-2 family protein	-
gi|20077109|gb|BQ095892.1|BQ095892	Uncharecterized protein	-
gi|20076909|gb|BQ095692.1|BQ095692	Uncharecterized protein	-
gi|20076839|gb|BQ095622.1|BQ095622	transthyretin-like protein 2 precursor	-
gi|20076797|gb|BQ095580.1|BQ095580	Uncharecterized protein	-
gi|20076625|gb|BQ095408.1|BQ095408	sxp ral-2 family protein	-
gi|20076559|gb|BQ095342.1|BQ095342	Uncharecterized protein	-
gi|20076174|gb|BQ094957.1|BQ094957	sxp ral-2 family protein	-
gi|19557625|gb|BM965427.1|BM965427	Uncharecterized protein	-
gi|19557205|gb|BM965201.1|BM965201	sxp ral-2 family protein	-
gi|19557182|gb|BM965189.1|BM965189	btbdomain containing 11
gi|19557119|gb|BM965156.1|BM965156	Uncharecterized protein	-
gi|19557108|gb|BM965149.1|BM965149	immunosuppressive ovarian message protein
gi|19557012|gb|BM965095.1|BM965095	timp metallopeptidase inhibitor 2	-
gi|19055607|gb|BM734274.1|BM734274	Uncharecterized protein	-
gi|19055585|gb|BM734252.1|BM734252	Uncharecterized protein	-
gi|19055484|gb|BM734151.1|BM734151	Uncharecterized protein	-
gi|19055482|gb|BM734149.1|BM734149	Uncharecterized protein	-
gi|19055445|gb|BM734112.1|BM734112	Uncharecterized protein	-
gi|19055415|gb|BM734082.1|BM734082	Uncharecterized protein	-
gi|19055387|gb|BM734054.1|BM734054	Uncharecterized protein	-
gi|19054934|gb|BM733601.1|BM733601	Uncharecterized protein	-
gi|19054603|gb|BM733270.1|BM733270	Uncharecterized protein	-
gi|19054594|gb|BM733261.1|BM733261	Uncharecterized protein	-
gi|19054574|gb|BM733241.1|BM733241	Uncharecterized protein	-
gi|19054524|gb|BM733191.1|BM733191	Uncharecterized protein	-
gi|19054516|gb|BM733183.1|BM733183	Uncharecterized protein	-
gi|19054505|gb|BM733172.1|BM733172	Uncharecterized protein	-
gi|19054488|gb|BM733155.1|BM733155	Uncharecterized protein	-
gi|19054428|gb|BM733095.1|BM733095	Uncharecterized protein	-
gi|19054344|gb|BM733011.1|BM733011	Uncharecterized protein	-
gi|19054331|gb|BM732998.1|BM732998	Uncharecterized protein	-
gi|18849763|gb|BM568868.1|BM568868	membrane-type 6 matrix metalloproteinase	EC:3.4.24,
gi|18849319|gb|BM568427.1|BM568427	Uncharecterized protein	-
gi|18829090|gb|BM567320.1|BM567320	Uncharecterized protein	-
gi|18829028|gb|BM567285.1|BM567285	Uncharecterized protein	-
gi|18828887|gb|BM567209.1|BM567209	Uncharecterized protein	-
gi|18828862|gb|BM567196.1|BM567196	Uncharecterized protein	-
gi|18828799|gb|BM567164.1|BM567164	Uncharecterized protein	-
gi|18828362|gb|BM566931.1|BM566931	Uncharecterized protein	-
gi|18828269|gb|BM566882.1|BM566882	Uncharecterized protein	-
gi|18828157|gb|BM566821.1|BM566821	Uncharecterized protein	-
gi|18827738|gb|BM566593.1|BM566593	Uncharecterized protein	-
gi|18689937|gb|BM518785.1|BM518785	Uncharecterized protein	-
gi|18689294|gb|BM518142.1|BM518142	Uncharecterized protein	-
gi|18688604|gb|BM517452.1|BM517452	proteinase inhibitor i4 serpin	-
gi|18688066|gb|BM516923.1|BM516923	Uncharecterized protein	-
gi|18688032|gb|BM516889.1|BM516889	Uncharecterized protein	-
gi|18687958|gb|BM516815.1|BM516815	Uncharecterized protein	-
gi|18687070|gb|BM515927.1|BM515927	glutathione s-transferase	EC:2.5.1.18,
gi|18054161|gb|BM319819.1|BM319819	Uncharecterized protein	-
gi|18053966|gb|BM319624.1|BM319624	Uncharecterized protein	-
gi|18053782|gb|BM319440.1|BM319440	Uncharecterized protein	-
gi|18053315|gb|BM318973.1|BM318973	Uncharecterized protein	-
gi|17994138|gb|BM285096.1|BM285096	Uncharecterized protein	-
gi|17994121|gb|BM285079.1|BM285079	sxp ral-2 family protein 2 isoform 1	-
gi|17994023|gb|BM284981.1|BM284981	nematode cuticle collagen n-terminal domain containing protein
gi|17993999|gb|BM284957.1|BM284957	cuticlin 1	-
gi|17993996|gb|BM284954.1|BM284954	nematode polyprotein allergen related family member (npa-1)	-
gi|17993939|gb|BM284897.1|BM284897	a proteinin chromosome ii	-
gi|17993797|gb|BM284755.1|BM284755	db module family protein	-
gi|17993552|gb|BM284510.1|BM284510	Uncharecterized protein	-
gi|17993453|gb|BM284411.1|BM284411	cysteine rich transmembrane bmp regulator 1 (chordin like)
gi|17993118|gb|BM284076.1|BM284076	cysteine-rich with egf-like domains 2	-
gi|17993069|gb|BM284027.1|BM284027	tfamily of potassium channels family member (twk-3)	-
gi|17991487|gb|BM282445.1|BM282445	Uncharecterized protein	-
gi|17991352|gb|BM282310.1|BM282310	chondroitinlycan family member (cpg-4)	-
gi|17991192|gb|BM282150.1|BM282150	ubiquinone menaquinone biosynthesis methyltransferase
gi|17991096|gb|BM282054.1|BM282054	g elongationmitochondrialisoform cra_b	EC:3.6.5.1, EC:3.6.5.2, EC:3.6.5.3, EC:3.6.5.4,
gi|17990288|gb|BM281246.1|BM281246	astacin-like protein	-
gi|17990228|gb|BM281186.1|BM281186	kunitz bovine pancreatic trypsin inhibitor domain containing protein	-
gi|17990196|gb|BM281154.1|BM281154	db module family protein	-
gi|17989913|gb|BM280871.1|BM280871	aspartylglucosaminidase	EC:3.5.1.26,
gi|17989811|gb|BM280769.1|BM280769	Uncharecterized protein	-
gi|17989781|gb|BM280746.1|BM280746	calcium-dependent protein kinase
gi|17989608|gb|BM280566.1|BM280566	cuticlin 1	-
gi|17989561|gb|BM280519.1|BM280519	protein disulfide isomerase associated 6
gi|17989496|gb|BM280454.1|BM280454	glycine receptor beta subunit
gi|17971857|gb|BM278599.1|BM278599	Uncharecterized protein	-
gi|17971160|gb|BM277902.1|BM277902	elongation factor 1 gamma
gi|16748132|gb|BM034561.1|BM034561	xaa-pro dipeptidase app	-
gi|16748063|gb|BM034492.1|BM034492	Uncharecterized protein	-
gi|16748035|gb|BM034464.1|BM034464	Uncharecterized protein	-
gi|16748004|gb|BM034433.1|BM034433	Uncharecterized protein	-
gi|16747944|gb|BM034373.1|BM034373	Uncharecterized protein	-
gi|16747812|gb|BM034241.1|BM034241	Uncharecterized protein	-
gi|16747649|gb|BM034078.1|BM034078	Uncharecterized protein	-
gi|16747537|gb|BM033966.1|BM033966	Uncharecterized protein	-
gi|16747242|gb|BM033671.1|BM033671	Uncharecterized protein	-
gi|16747166|gb|BM033595.1|BM033595	immunosuppressive ovarian message protein	-
gi|16746986|gb|BM033415.1|BM033415	typealphaisoform cra_b	-
gi|16746922|gb|BM033351.1|BM033351	Uncharecterized protein	-
gi|16746550|gb|BM032979.1|BM032979	immunosuppressive ovarian message protein	-
gi|16746292|gb|BM032721.1|BM032721	subfamilymember 9
gi|15787329|gb|BI784437.1|BI784437	Uncharecterized protein	-
gi|15787268|gb|BI784376.1|BI784376	Uncharecterized protein	-
gi|15787265|gb|BI784373.1|BI784373	Uncharecterized protein	-
gi|15786915|gb|BI784023.1|BI784023	Uncharecterized protein	-
gi|15786906|gb|BI784014.1|BI784014	Uncharecterized protein	-
gi|15786414|gb|BI783522.1|BI783522	Uncharecterized protein	-
gi|15786312|gb|BI783420.1|BI783420	Uncharecterized protein	-
gi|15786246|gb|BI783354.1|BI783354	Uncharecterized protein	-
gi|15786217|gb|BI783325.1|BI783325	Uncharecterized protein	-
gi|15786199|gb|BI783307.1|BI783307	Uncharecterized protein	-
gi|15786191a|gb|BI783299.1|BI783299	Uncharecterized protein	-
gi|15786176|gb|BI783284.1|BI783284	Uncharecterized protein	-
gi|15785811|gb|BI782919.1|BI782919	typealphaisoform cra_b	-
gi|15785735|gb|BI782843.1|BI782843	matrilinisoform cra_b	-
gi|15785730|gb|BI782838.1|BI782838	mannose-6-phosphate protein p76
gi|15785648|gb|BI782756.1|BI782756	matrilinisoform cra_b	-
gi|15785313|gb|BI782421.1|BI782421	prion-like-(q n-rich)-domain-bearing protein family member (pqn-98)	-
gi|15785257|gb|BI782365.1|BI782365	Uncharecterized protein	-
gi|15785116|gb|BI782224.1|BI782224	Uncharecterized protein	-
gi|15784895|gb|BI782003.1|BI782003	Uncharecterized protein	-
gi|15784853|gb|BI781961.1|BI781961	Uncharecterized protein	-
gi|15784613|gb|BI781721.1|BI781721	Uncharecterized protein	-
gi|15498442|gb|BI594955.1|BI594955	solute carrier family 22 (organic anion transporter)member 6
gi|15498400|gb|BI594913.1|BI594913	Uncharecterized protein	-
gi|15498328|gb|BI594841.1|BI594841	Uncharecterized protein	-
gi|15497846|gb|BI594359.1|BI594359	collagen family member (col-68)
gi|14020136|gb|BG733852.1|BG733852	neuropeptide-like protein family member (nlp-37)	-
gi|14020130|gb|BG733846.1|BG733846	dhsd_ascsusuccinate dehydrogenasecytochrome b smallmitochondrial precursor(succinate-ubiquinone reductase membrane anchor subunit) (cytochrome b558 small subunit)
gi|14020123|gb|BG733839.1|BG733839	Uncharecterized protein	-
gi|14019907|gb|BG733623.1|BG733623	chitin binding peritrophin-a domain containing protein	-
gi|11141008|gb|BF228416.1|BF228416	Uncharecterized protein	-
Dictyocaulus_viviparus_Contig34	secreted protein 5 precursor	-
Dictyocaulus_viviparus_Contig55	ground-like (grd related) family member (grl-7)
Dictyocaulus_viviparus_Contig57	glyceraldehyde-3-phosphate dehydrogenase	EC:1.2.1.12, EC:1.2.1.11,
Dictyocaulus_viviparus_Contig63	Uncharecterized protein	-
Dictyocaulus_viviparus_Contig73	beta-tubulin isotype 1	EC:3.6.5.1, EC:3.6.5.2, EC:3.6.5.3, EC:3.6.5.4,
Dictyocaulus_viviparus_Contig107	brugia malayi	-
Dictyocaulus_viviparus_Contig117	Uncharecterized protein	-
Dictyocaulus_viviparus_Contig121	Uncharecterized protein	-
Dictyocaulus_viviparus_Contig135	heat shock protein 70
Dictyocaulus_viviparus_Contig143	protein disulfide isomerase associated 6
Dictyocaulus_viviparus_Contig180	secreted protein 5 precursor	-
Dictyocaulus_viviparus_Contig225	cysteine proteinase
Dictyocaulus_viviparus_Contig238	Uncharecterized protein	-
Dictyocaulus_viviparus_Contig248	Uncharecterized protein	-
Dictyocaulus_viviparus_Contig261	Uncharecterized protein	-
Dictyocaulus_viviparus_Contig269	secreted protein asp-2	-
Dictyocaulus_viviparus_Contig278	Uncharecterized protein	-
Dictyocaulus_viviparus_Contig292	novel immunogenic protein nip-	-
Dictyocaulus_viviparus_Contig309	phospholipase a2
Dictyocaulus_viviparus_Contig325	nuclear hormone receptor family member (nhr-142)
Dictyocaulus_viviparus_Contig326	cysteine protease inhibitor family member (cpi-2)
Dictyocaulus_viviparus_Contig327	uncoordinated family member (unc-89)
Dictyocaulus_viviparus_Contig330	Uncharecterized protein	-
Dictyocaulus_viviparus_Contig335	Uncharecterized protein	-
Dictyocaulus_viviparus_Contig349	vitellogenin structural genes (yolk protein genes) proteinisoform a
Dictyocaulus_viviparus_Contig352;	inorganic pyrophosphatase	EC:3.6.1.1,
Dictyocaulus_viviparus_Contig357	secreted protein 5 precursor	-
Dictyocaulus_viviparus_Contig371	peptidylglycine alpha-amidating monooxygenase
Dictyocaulus_viviparus_Contig403	aspartyl protease family member (asp-2)
Dictyocaulus_viviparus_Contig417;	transmembrane emp24 protein transport domain containing 7
Dictyocaulus_viviparus_Contig428	onchocerca related antigen family member (ora-1)	-
Dictyocaulus_viviparus_Contig457	serine threonine protein
Dictyocaulus_viviparus_Contig466	secreted protein 5 precursor	-
gi|154849860|gb|EV854287.1|EV854287	carboxypeptidase e	EC:3.4.17.10,
gi|154849439|gb|EV853866.1|EV853866	adenylate cyclase	-
gi|154849202|gb|EV853634.1|EV853634	pa2l_caeel phospholipase a2-like proteinprecursor	-
gi|154849096|gb|EV853528.1|EV853528	leishmanolysin-like (metallopeptidase m8 family)
gi|154849080|gb|EV853512.1|EV853512	Uncharecterized protein	-
gi|154849072|gb|EV853504.1|EV853504	pa2l_caeel phospholipase a2-like proteinprecursor	-
gi|154849067|gb|EV853499.1|EV853499	cathepsin b-like cysteine proteinase
gi|154849015|gb|EV853447.1|EV853447	Uncharecterized protein	-
gi|154848557|gb|EV852989.1|EV852989	leucine rich repeat containing 15	-
gi|154848499|gb|EV852931.1|EV852931	Uncharecterized protein	-
gi|154848272|gb|EV852704.1|EV852704	Uncharecterized protein	-
gi|154848190|gb|EV852622.1|EV852622	mgc108301 protein	-
gi|154848159|gb|EV852591.1|EV852591	Uncharecterized protein	-
gi|154848114|gb|EV852546.1|EV852546	Uncharecterized protein	-
gi|154848005|gb|EV852437.1|EV852437	Uncharecterized protein	-
gi|154847896|gb|EV852328.1|EV852328	fmrf-like peptide family member (flp-1)
gi|154847832|gb|EV852264.1|EV852264	Uncharecterized protein	-
gi|154847752|gb|EV852184.1|EV852184	secreted protein 5 precursor	-
gi|154847698|gb|EV852130.1|EV852130	Uncharecterized protein
gi|154847647|gb|EV852079.1|EV852079	c-type lectin family member (clec-88)	-
gi|154847616|gb|EV852048.1|EV852048	cathepsin l-like cysteine proteinase	EC:3.4.22,
gi|154847552|gb|EV851984.1|EV851984	cg13124-isoform a
gi|154847404|gb|EV851836.1|EV851836	Uncharecterized protein	-
gi|154847360|gb|EV851792.1|EV851792	Uncharecterized protein	-
gi|154847234|gb|EV851666.1|EV851666	chondroitinlycan family member (cpg-3)	-
gi|154847153|gb|EV851585.1|EV851585	aspartyl protease family member (asp-2)
gi|154847114|gb|EV851546.1|EV851546	ing defective family member (mlt-9)
gi|154847052|gb|EV851479.1|EV851479	ubiquitin-activating enzyme e1
gi|154847037|gb|EV851464.1|EV851464	peptidylglycine alpha-amidating monooxygenase
gi|154846947|gb|EV851374.1|EV851374	Uncharecterized protein	-
gi|154846870|gb|EV851297.1|EV851297	Uncharecterized protein	-
gi|154846817|gb|EV851244.1|EV851244	Uncharecterized protein	-
gi|154846809|gb|EV851236.1|EV851236	venom allergen-like protein	-
gi|154846686|gb|EV851113.1|EV851113	Uncharecterized protein	-
gi|154846643|gb|EV851070.1|EV851070	venom allergen-like protein	-
gi|154846633|gb|EV851060.1|EV851060	a protein in rck1-ams1 intergenic	-
gi|154846597|gb|EV851024.1|EV851024	Uncharecterized protein	-
gi|154846436|gb|EV850863.1|EV850863	Uncharecterized protein	-
gi|154846282|gb|EV850709.1|EV850709	Uncharecterized protein	-
gi|154846252|gb|EV850679.1|EV850679	secreted acetylcholinesterase	EC:3.1.1.7, EC:3.1.1.8,
gi|154846182|gb|EV850609.1|EV850609	sperm-specificclass q family member (ssq-2)	-
gi|154846110|gb|EV850537.1|EV850537	Uncharecterized protein	-
gi|154846059|gb|EV850486.1|EV850486	Uncharecterized protein	-
gi|154845818|gb|EV850245.1|EV850245	Uncharecterized protein	-
gi|154845611|gb|EV850038.1|EV850038	Uncharecterized protein	-
gi|154845582|gb|EV850009.1|EV850009	ck1 family protein kinase	-
gi|154845546|gb|EV849973.1|EV849973	cg1168-isoform a
Dirofilaria_immitis_Contig46	Uncharecterized protein	-
Dirofilaria_immitis_Contig67	mannan-binding lectin	-
Dirofilaria_immitis_Contig104	major allergen	-
Dirofilaria_immitis_Contig128	Uncharecterized protein	-
Dirofilaria_immitis_Contig174	Uncharecterized protein	-
Dirofilaria_immitis_Contig198	lectin c-type domain containing protein	-
Dirofilaria_immitis_Contig287	Uncharecterized protein	-
Dirofilaria_immitis_Contig310	signal sequence receptor delta
Dirofilaria_immitis_Contig355	protein kinase domain containing protein	-
Dirofilaria_immitis_Contig410	Uncharecterized protein	-
Dirofilaria_immitis_Contig412	Uncharecterized protein	-
Dirofilaria_immitis_Contig434	domain containing protein	-
Dirofilaria_immitis_Contig453	temporarily assigned gene name family member (tag-169)
Dirofilaria_immitis_Contig519	col4a1 protein	-
gi|21318225|gb|BQ482289.1|BQ482289	Uncharecterized protein	-
gi|21318155|gb|BQ482211.1|BQ482211	Uncharecterized protein	-
gi|21259867|gb|BQ456755.1|BQ456755	Uncharecterized protein	-
gi|21259035|gb|BQ455923.1|BQ455923	es2 protein
gi|21258325|gb|BQ455213.1|BQ455213	selenoprotein t
gi|21258150|gb|BQ455038.1|BQ455038	a proteinin chromosome ii
gi|21258025|gb|BQ454913.1|BQ454913	Uncharecterized protein	-
gi|21257682|gb|BQ454570.1|BQ454570	Uncharecterized protein	-
Haemonchus_contortus_Contig7	mannosec type 1-like 1	-
Haemonchus_contortus_Contig96	temporarily assigned gene name family member (tag-196)
Haemonchus_contortus_Contig129	low density lipoprotein 1b (deleted in tumors)
Haemonchus_contortus_Contig132	novel es antigen	-
Haemonchus_contortus_Contig161	Uncharecterized protein	-
Haemonchus_contortus_Contig163	cysteine proteinase	EC:3.4.22,
Haemonchus_contortus_Contig173	cd69 molecule	-
Haemonchus_contortus_Contig175	Uncharecterized protein	-
Haemonchus_contortus_Contig185	cysteine proteinase
Haemonchus_contortus_Contig191	Uncharecterized protein	-
Haemonchus_contortus_Contig195	Uncharecterized protein	-
Haemonchus_contortus_Contig197	Uncharecterized protein	-
Haemonchus_contortus_Contig218	est2_caeelesterase cm06b1	-
Haemonchus_contortus_Contig253	phospholipase a2
Haemonchus_contortus_Contig258	Uncharecterized protein	-
Haemonchus_contortus_Contig264	cysteine proteinase	EC:3.4.22,
Haemonchus_contortus_Contig273	heat shock 10kda protein 1 (chaperonin 10)
Haemonchus_contortus_Contig290	chondroitinlycan family member (cpg-3)	-
Haemonchus_contortus_Contig311	signal recognition particle gtpase	-
Haemonchus_contortus_Contig317	cysteine proteinase	EC:3.4.22,
Haemonchus_contortus_Contig342	secreted protein asp-2	-
Haemonchus_contortus_Contig351	cd209l1 protein
Haemonchus_contortus_Contig352	dihydropteridine reductase	EC:1.5.1.34,
Haemonchus_contortus_Contig360	Uncharecterized protein	-
Haemonchus_contortus_Contig442	lysophospholipase i	EC:3.1.1.5,
Haemonchus_contortus_Contig458	mitochondrial ribosomal protein s11	EC:3.6.5.3,
Haemonchus_contortus_Contig512	Uncharecterized protein	-
Haemonchus_contortus_Contig525	cysteine proteinase	EC:3.4.22,
Haemonchus_contortus_Contig526	Uncharecterized protein	-
Haemonchus_contortus_Contig628	isoform cra_a	-
Haemonchus_contortus_Contig639	transmembrane emp24 protein transport domain containing 9
Haemonchus_contortus_Contig649	protein disulfide isomerase	EC:5.3.4.1, EC:2.3.2.13,
Haemonchus_contortus_Contig673	Uncharecterized protein	-
Haemonchus_contortus_Contig677	Uncharecterized protein	-
Haemonchus_contortus_Contig679	nim-2 protein	-
Haemonchus_contortus_Contig688	Uncharecterized protein	-
Haemonchus_contortus_Contig696	alp enigma encoding family member (alp-1)
Haemonchus_contortus_Contig705	nim-1 protein	-
Haemonchus_contortus_Contig710	Uncharecterized protein	-
Haemonchus_contortus_Contig721	nim-2 protein	-
Haemonchus_contortus_Contig722	Uncharecterized protein	-
Haemonchus_contortus_Contig723	solute carrier family 25 (mitochondrial carrier phosphate carrier)member 24	-
Haemonchus_contortus_Contig728	globin
Haemonchus_contortus_Contig735	saposin b domain-containing protein	-
Haemonchus_contortus_Contig738	lactoylglutathione lyase	EC:4.4.1.5,
Haemonchus_contortus_Contig754	d-aspartate oxidase
Haemonchus_contortus_Contig755	vacuolar h atpase family member (vha-19)
Haemonchus_contortus_Contig759	keratin-like protein	-
Haemonchus_contortus_Contig766	venom-allergen-like protein family member (vap-1)	-
Haemonchus_contortus_Contig769	Uncharecterized protein	-
Haemonchus_contortus_Contig770	Uncharecterized protein	-
Haemonchus_contortus_Contig773	dolichyl-diphosphooligosaccharide-protein glycosyltransferase	EC:2.4.1.119,
Haemonchus_contortus_Contig774	cysteine proteinase	EC:3.4.22,
Haemonchus_contortus_Contig785	ilin (drosophila ecm protein) homolog family member (ppn-1)
Haemonchus_contortus_Contig788	24 kda secreted protein	-
Haemonchus_contortus_Contig792	saposin-like protein 1	-
Haemonchus_contortus_Contig793	brugia malayi	-
Haemonchus_contortus_Contig805	gamma-inducible protein 30	-
Haemonchus_contortus_Contig809	protein disulfide isomerase	EC:5.3.4.1, EC:1.14.11.2, EC:2.3.2.13,
Haemonchus_contortus_Contig820	aspartyl protease family member (asp-2)	EC:3.4.23.1,
Haemonchus_contortus_Contig826	Uncharecterized protein	-
Haemonchus_contortus_Contig832	c-type lectin family member (clec-88)	-
Haemonchus_contortus_Contig844	Uncharecterized protein	-
Haemonchus_contortus_Contig846	intestinal prolyl carboxypeptidase 2	-
Haemonchus_contortus_Contig863	cd69 molecule	-
Haemonchus_contortus_Contig867	Uncharecterized protein	-
Haemonchus_contortus_Contig869	Uncharecterized protein	-
Haemonchus_contortus_Contig876	lysozyme 3	EC:3.2.1.17,
Haemonchus_contortus_Contig879	Uncharecterized protein	-
Haemonchus_contortus_Contig881	Uncharecterized protein	-
Haemonchus_contortus_Contig891	Uncharecterized protein	-
Haemonchus_contortus_Contig908	Uncharecterized protein	-
Haemonchus_contortus_Contig911	precursor transthyretin like protein 1	-
Haemonchus_contortus_Contig922	Uncharecterized protein	-
Haemonchus_contortus_Contig924	c-type lectin family member (clec-88)	-
Haemonchus_contortus_Contig927	Uncharecterized protein	-
Haemonchus_contortus_Contig930	cysteine proteinase	EC:3.4.22,
Haemonchus_contortus_Contig933	c-type lectin precursor	-
Haemonchus_contortus_Contig941	Uncharecterized protein	-
Haemonchus_contortus_Contig942	ribosomal protein s15a	EC:3.6.5.3,
Haemonchus_contortus_Contig955	20 kda es antigen protein	-
Haemonchus_contortus_Contig974	keratin-like protein	-
Haemonchus_contortus_Contig977	fatty acid and retinol-binding protein 1
Haemonchus_contortus_Contig983	Uncharecterized protein	-
Haemonchus_contortus_Contig984	db module family protein	-
Haemonchus_contortus_Contig990	yfmo_caeel transthyretin-like proteinprecursor	-
Haemonchus_contortus_Contig1033	Uncharecterized protein	-
Haemonchus_contortus_Contig1035	cysteine proteinase	EC:3.4.22,
Haemonchus_contortus_Contig1038	cysteine proteinase	EC:3.4.22,
Haemonchus_contortus_Contig1084	superoxide dismutase
Haemonchus_contortus_Contig1085	phosphoinositide 5-phosphatase type ii	-
Haemonchus_contortus_Contig1086	phospholipase a2
Haemonchus_contortus_Contig1090	cysteine proteinase
Haemonchus_contortus_Contig1179	divalent cation tolerance
Haemonchus_contortus_Contig1197	cysteine proteinase
Haemonchus_contortus_Contig1198	secreted protein asp-2
Haemonchus_contortus_Contig1200	venom-allergen-like protein family member (vap-1)	-
Haemonchus_contortus_Contig1202	cysteine proteinase	EC:3.4.22,
Haemonchus_contortus_Contig1203	-	-
Haemonchus_contortus_Contig1204	Uncharecterized protein	-
Haemonchus_contortus_Contig1209	phospholipase a2
Haemonchus_contortus_Contig1210	15 kda excretory secretory protein	-
Haemonchus_contortus_Contig1211	cysteine proteinase	EC:3.4.22,
Haemonchus_contortus_Contig1213	cysteine proteinase
Haemonchus_contortus_Contig1223	venom-allergen-like protein family member (vap-1)	-
Haemonchus_contortus_Contig1225	cysteine proteinase
Haemonchus_contortus_Contig1226	cysteine proteinase	EC:3.4.22,
Haemonchus_contortus_Contig1227	ribosomal protein l23a	EC:3.6.5.3,
Haemonchus_contortus_Contig1234	cysteine proteinase
Haemonchus_contortus_Contig1241	cysteine proteinase	EC:3.4.22,
Haemonchus_contortus_Contig1243	cysteine proteinase
Haemonchus_contortus_Contig1246	cysteine proteinase
Haemonchus_contortus_Contig1263	cysteine proteinase
Haemonchus_contortus_Contig1264	lysozyme 1
Haemonchus_contortus_Contig1267	cysteine proteinase	EC:3.4.22,
Haemonchus_contortus_Contig1269	secreted protein asp-2
Haemonchus_contortus_Contig1276	cysteine proteinase	EC:3.4.22,
Haemonchus_contortus_Contig1280	-	-
Haemonchus_contortus_Contig1281	15 kda excretory secretory protein	-
Haemonchus_contortus_Contig1283	c-type lectin family member (clec-88)
Haemonchus_contortus_Contig1304	dual specificity phosphatase 19
Haemonchus_contortus_Contig1319	puromycin-sensitive aminopeptidase
Haemonchus_contortus_Contig1346	phosphoglycerate mutase family protein	-
Haemonchus_contortus_Contig1351	cysteine proteinase
Haemonchus_contortus_Contig1359	Uncharecterized protein	-
Haemonchus_contortus_Contig1366	aspartyl protease inhibitor 1
Haemonchus_contortus_Contig1373	precursor transthyretin like protein 1	-
Haemonchus_contortus_Contig1376	hypothetical upf0205 proteinin chromosome iii	-
Haemonchus_contortus_Contig1378	loc398633 protein
Haemonchus_contortus_Contig1387	Uncharecterized protein	-
Haemonchus_contortus_Contig1397	Uncharecterized protein	-
Haemonchus_contortus_Contig1398	Uncharecterized protein	-
Haemonchus_contortus_Contig1403	cd69 molecule	-
Haemonchus_contortus_Contig1409	aspartyl protease family member (asp-2)
Haemonchus_contortus_Contig1410	Uncharecterized protein	-
Haemonchus_contortus_Contig1411	keratin-like protein
Haemonchus_contortus_Contig1446	cathepsin d	EC:3.4.23,
Haemonchus_contortus_Contig1455	venom-allergen-like protein family member (vap-1)	-
Haemonchus_contortus_Contig1465	chondroitinlycan family member (cpg-4)	-
Haemonchus_contortus_Contig1472	Uncharecterized protein	-
Haemonchus_contortus_Contig1476	Uncharecterized protein	-
Haemonchus_contortus_Contig1477	secreted protein asp-2	-
Haemonchus_contortus_Contig1491	Uncharecterized protein	-
Haemonchus_contortus_Contig1493	cathepsin d	EC:3.4.23.1, EC:3.4.23.5,
Haemonchus_contortus_Contig1496	transthyretin-like protein 3 precursor	-
Haemonchus_contortus_Contig1506	Uncharecterized protein	-
Haemonchus_contortus_Contig1509	Uncharecterized protein	-
Haemonchus_contortus_Contig1542	Uncharecterized protein	-
Haemonchus_contortus_Contig1543	Uncharecterized protein	-
Haemonchus_contortus_Contig1557	aspartyl protease inhibitor 1
Haemonchus_contortus_Contig1561	Uncharecterized protein	-
Haemonchus_contortus_Contig1565	fmrfamide-related peptide flp-18 precursor
Haemonchus_contortus_Contig1576	Uncharecterized protein	-
Haemonchus_contortus_Contig1582	phosphatidylethanolamine-binding protein	-
Haemonchus_contortus_Contig1594;	Uncharecterized protein	-
Haemonchus_contortus_Contig1605	secreted protein 4 precursor	-
Haemonchus_contortus_Contig1612	fatty acid retinoid binding protein	-
Haemonchus_contortus_Contig1641	precursor transthyretin like protein 1	-
Haemonchus_contortus_Contig1660	Uncharecterized protein	-
Haemonchus_contortus_Contig1664	Uncharecterized protein
Haemonchus_contortus_Contig1666	Uncharecterized protein
Haemonchus_contortus_Contig1677	precursor transthyretin like protein 1	-
Haemonchus_contortus_Contig1688	loc495430 protein
Haemonchus_contortus_Contig1695	immunogenic protein 3	-
Haemonchus_contortus_Contig1701	neuropeptide-like protein family member (nlp-18)	-
Haemonchus_contortus_Contig1716;	Uncharecterized protein	-
Haemonchus_contortus_Contig1718	l3b25 precusor	-
Haemonchus_contortus_Contig1723	transthyretin-like family protein	-
Haemonchus_contortus_Contig1724	Uncharecterized protein	-
Haemonchus_contortus_Contig1749	hypothetical upf0205 proteinin chromosome iii	-
Haemonchus_contortus_Contig1768	24 kda excretory secretory protein	-
Haemonchus_contortus_Contig1769	venom-allergen-like protein family member (vap-1)	-
Haemonchus_contortus_Contig1781	cysteine proteinase	EC:3.4.22,
Haemonchus_contortus_Contig1786	cysteine proteinase	EC:3.4.22,
Haemonchus_contortus_Contig1800	calumenin
Haemonchus_contortus_Contig1808	cysteine proteinase
Haemonchus_contortus_Contig1816	pharyngeal gland toxin-related family member (phat-4)	-
Haemonchus_contortus_Contig1825	Uncharecterized protein	-
Haemonchus_contortus_Contig1829	Uncharecterized protein	-
Haemonchus_contortus_Contig1840	transthyretin-like family protein	-
Haemonchus_contortus_Contig1852	venom-allergen-like protein family member (vap-1)	-
Haemonchus_contortus_Contig1856	globin
Haemonchus_contortus_Contig1859	globin
Haemonchus_contortus_Contig1871	bm-40 precursor
Haemonchus_contortus_Contig1874	calreticulin
Haemonchus_contortus_Contig1888	Uncharecterized protein	-
Haemonchus_contortus_Contig1903;	cysteine proteinase
Haemonchus_contortus_Contig1907	cysteine proteinase
gi|28915242|gb|CB333379.1|CB333379	mitochondrial ribosomal
gi|28915150|gb|CB333287.1|CB333287	pepsinogen a
gi|28914104|gb|CB332296.1|CB332296	mitochondrial ribosomal protein s18c	EC:3.6.5.3,
gi|28913881|gb|CB332073.1|CB332073	taf7-like rna polymerasetata box binding protein-associated factor
gi|28255596|gb|CB192204.1|CB192204	Uncharecterized protein	-
gi|28255100|gb|CB191708.1|CB191708	cg3925 cg3925-isoform a	-
gi|28254965|gb|CB191573.1|CB191573	epididymal secretory protein e1	-
gi|28254824|gb|CB191432.1|CB191432	Uncharecterized protein	-
gi|27925681|gb|CB099874.1|CB099874	Uncharecterized protein	-
gi|27810027|gb|CB064449.1|CB064449	Uncharecterized protein	-
gi|27595538|gb|CB020802.1|CB020802	thioredoxin 2
gi|27594726|gb|CB019990.1|CB019990	signal sequence receptor delta
gi|27594004|gb|CB019268.1|CB019268	mitochondrial ribosomal protein s28	-
gi|27593984|gb|CB019248.1|CB019248	Uncharecterized protein	-
gi|27591007|gb|CB016271.1|CB016271	fmrfamide (agap005518-pa)
gi|27590994|gb|CB016258.1|CB016258	surface-associated antigen 1	-
gi|27590877|gb|CB016141.1|CB016141	Uncharecterized protein	-
gi|27590861|gb|CB016125.1|CB016125	cg17218-isoform a	-
gi|27590776|gb|CB016040.1|CB016040	Uncharecterized protein	-
gi|27590755|gb|CB016019.1|CB016019	db module family protein	-
gi|27590622|gb|CB015886.1|CB015886	Uncharecterized protein	-
gi|27590458|gb|CB015722.1|CB015722	Uncharecterized protein	-
gi|27590435|gb|CB015699.1|CB015699	dmon1_caeel domon domain-containing proteinprecursor	-
gi|27590376|gb|CB015640.1|CB015640	Uncharecterized protein	-
gi|27590076|gb|CB015340.1|CB015340	Uncharecterized protein	-
gi|27590020|gb|CB015284.1|CB015284	nim-2 protein	-
gi|27590012|gb|CB015276.1|CB015276	Uncharecterized protein	-
gi|27589900|gb|CB015164.1|CB015164	casein kinasebeta polypeptide
gi|27589782|gb|CB015046.1|CB015046	cysteine proteinase	EC:3.4.22,
gi|27587757|gb|CB013021.1|CB013021	cd69 molecule	-
gi|27587674|gb|CB012938.1|CB012938	ectonucleoside triphosphate diphosphohydrolaseisoform cra_b	EC:3.6.1.6, EC:2.3.3, EC:3.6.1.15,
gi|27587664|gb|CB012928.1|CB012928	Uncharecterized protein	-
gi|27587643|gb|CB012907.1|CB012907	Uncharecterized protein	-
gi|27587622|gb|CB012886.1|CB012886	Uncharecterized protein	-
gi|27587609|gb|CB012873.1|CB012873	Uncharecterized protein	-
gi|27587517|gb|CB012781.1|CB012781	Uncharecterized protein	-
gi|27587450|gb|CB012714.1|CB012714	c-type lectin family member (clec-88)	-
gi|27587437|gb|CB012701.1|CB012701	cd209l1 protein
gi|27587401|gb|CB012665.1|CB012665	temporarily assigned gene name family member (tag-234)	-
gi|27587350|gb|CB012614.1|CB012614	beta-mannosidase
gi|27587339|gb|CB012603.1|CB012603	Uncharecterized protein	-
gi|27587337|gb|CB012601.1|CB012601	c-type lectin family member (clec-88)	-
gi|27587334|gb|CB012598.1|CB012598	prion-like-(q n-rich)-domain-bearing protein family member (pqn-83)
gi|27587305|gb|CB012569.1|CB012569	Uncharecterized protein	-
gi|27587185|gb|CB012449.1|CB012449	Uncharecterized protein	-
gi|27587163|gb|CB012427.1|CB012427	c-type lectin family member (clec-88)	-
gi|27587162|gb|CB012426.1|CB012426	Uncharecterized protein	-
[truncated: 2,710 more rows]
